EPA decoration is essential for virulence

1        **Decoration of the enterococcal polysaccharide antigen EPA is essential for virulence,**  
2        **cell surface charge and sensitivity to effector molecules of innate immunity**

3

4

5        Robert E. Smith <sup>1,2†</sup>, Bartłomiej Salamaga <sup>1,2†</sup>, Piotr Szkuta <sup>1,2</sup>, Natalia Hajdamowicz <sup>1,2</sup>,  
6        Tomasz K. Prajsnar <sup>1,2</sup>, Gregory Bulmer <sup>1,2</sup>, Thierry Fontaine <sup>3</sup>, Justyna Kołodziejczyk <sup>1,2</sup>,  
7        Jean-Marie Herry <sup>4</sup>, Andrea Hounslow <sup>1,2</sup>, Mike P. Williamson <sup>1,2</sup>,  
8        Pascale Serror <sup>4\*</sup> and Stéphane Mesnage <sup>1,2\*</sup>

9

10

11        <sup>1</sup> Krebs Institute, University of Sheffield, Firth Court, Western Bank, Sheffield S10 2TN,  
12        UK;

13        <sup>2</sup> Department of Molecular Biology and Biotechnology, University of Sheffield, Firth Court,  
14        Western Bank, Sheffield S10 2TN, UK;

15        <sup>3</sup> Unité des Aspergillus, Institut Pasteur, 75015 Paris, France;

16        <sup>4</sup> Micalis Institute, INRA, AgroParisTech, Université Paris-Saclay, 78350 Jouy en Josas,  
17        France

18

19

20        † These authors contributed equally to this work

21

22

23        \* Corresponding authors

24        Email: [s.mesnage@sheffield.ac.uk](mailto:s.mesnage@sheffield.ac.uk); [pascale.serror@inra.fr](mailto:pascale.serror@inra.fr)

25

26

27

28        **Short title:** EPA decoration is essential for pathogenesis

29

30

31 **Abstract**

32 *Enterococcus faecalis* is an opportunistic pathogen with an intrinsically high resistance to  
33 lysozyme, a key effector of the innate immune system. This high level of resistance requires  
34 several genes (*oatA*, *pgdA*, *dltA* and *sigV*) acting synergistically to inhibit both the enzymatic  
35 and cationic antimicrobial peptide activities of lysozyme. We sought to identify novel genes  
36 modulating *E. faecalis* resistance to lysozyme. Random transposon mutagenesis carried out in  
37 the quadruple *oatA/pgdA/dltA/sigV* mutant led to the identification of several independent  
38 insertions clustered on the chromosome. These mutations were located in a locus referred to as  
39 the enterococcal polysaccharide antigen (EPA) variable region located downstream of the  
40 highly conserved *epaA-epaR* genes proposed to encode a core synthetic machinery. The *epa*  
41 variable region was previously proposed to be responsible for EPA decorations, but the role of  
42 this locus remains largely unknown. Here, we show that EPA decoration contributes to  
43 resistance towards charged antimicrobials and underpins virulence in the zebrafish model of  
44 infection by conferring resistance to phagocytosis. Collectively, our results indicate that the  
45 production of the EPA rhamnopolysaccharide backbone is not sufficient to promote *E. faecalis*  
46 infections and reveal an essential role of the modification of this surface polymer for  
47 enterococcal pathogenesis.

48

49 **Introduction**

50

51 *Enterococcus faecalis* is a commensal bacterium found in the gastro-intestinal tract of  
52 humans and frequently isolated from the environment as a result of faecal contamination [1,  
53 2]. Although this organism is considered as harmless in healthy carriers, *E. faecalis* has been  
54 proposed to contribute to the pathogenesis of inflammatory bowel disease and colorectal  
55 cancer [3, 4]. *E. faecalis* can also cause a wide range of hospital-acquired opportunistic  
56 infections that can be life-threatening [1]. *E. faecalis* infections can be difficult to treat due to  
57 the resistance of this organism to antibiotics such as cephalosporins and glycopeptides  
58 (Vancomycin Resistant Enterococci, VRE) and its capacity to form biofilms [5].  
59 Interestingly, *E. faecalis* strains responsible for hospital-acquired infections are also found in  
60 healthy individuals and genes associated with virulence are not only present in clinical  
61 isolates [6]. How this organism can cause infections is therefore not entirely understood. One  
62 property of *E. faecalis* that contributes to the onset of infections is its resistance to the host  
63 innate immune system. Cell surface polymers including teichoic acids (TAs), a capsule and  
64 the enterococcal polysaccharide antigen (EPA) confer phagocytosis evasion and resistance to  
65 complement activation [7-9]. *E. faecalis* also displays an intrinsically high resistance to  
66 lysozyme, a key component of the innate immune system representing a first line of defence  
67 against pathogens. Lysozyme is found in virtually all human biological fluids including  
68 saliva, milk, serum and tears where it is found at concentrations between 1-2 mg ml<sup>-1</sup> [10,  
69 11]. Lysozyme has two distinct antimicrobial activities. Firstly, it hydrolyses the glycan  
70 chains of peptidoglycan, the major component of the bacterial cell wall, causing cell lysis  
71 [12]. Secondly, lysozyme displays cationic antimicrobial peptide (CAMP) activity. Lysozyme  
72 contains highly charged C-terminal sequences (RAWVAWRNR in human lysozyme)  
73 sufficient to inhibit bacterial growth [13] by causing membrane permeabilization [14].  
74 Four genes (*oatA*, *pgdA*, *dltA* and *sigV*) contribute synergistically to lysozyme resistance in *E.*  
75 *faecalis*. Both OatA and PgdA modify peptidoglycan glycan strands, thereby inhibiting  
76 lysozyme catalytic activity. OatA is an *O*-acetyl transferase that transfers an acetyl group  
77 onto the C6-OH group of *N*-acetylmuramic acid residues [15]. PgdA is produced in response  
78 to lysozyme and is an esterase that removes the acetyl group in position 2 of *N*-  
79 acetylglucosamine residues [16]. DltA is a D-alanine-D-alanyl carrier ligase essential for the  
80 alanylation of TAs. It has been proposed that this modification reduces the net negative  
81 charge of TAs and inhibits the CAMP activity of lysozyme [17]. SigV is an extracytoplasmic  
82 sigma factor that controls the expression level of *pgdA* in response to lysozyme [18, 19].

## EPA decoration is essential for virulence

83 *oatA*, *pgdA*, *dltA* and *sigV* act in concert to confer high-level resistance to lysozyme in *E.*  
84 *faecalis*. Deletions in these genes (alone or in combination) have been associated with a  
85 reduction in virulence in mice or *Galleria mellonella* [18, 19] and a decrease in survival  
86 within murine peritoneal macrophages [15].

87 In this study, we show that the quadruple mutant (*oatA*, *pgdA*, *dltA* and *sigV*; *OPDV* strain)  
88 still displays a relatively high resistance to lysozyme in comparison to other Firmicutes.  
89 Using transposon mutagenesis, we used this quadruple mutant to carry out transposon  
90 mutagenesis and to identify additional genes involved in lysozyme resistance. We show that  
91 several genes contributing to the decoration of the enterococcal polysaccharide antigen play  
92 an essential role in the resistance to effectors of the innate immune system and in virulence.

93 **Results**

94

95 **The *E. faecalis* quadruple mutant harboring deletions in *oatA*, *pgdA*, *dltA* and *sigV***  
96 **displays a relatively high residual resistance to lysozyme.**

97 We determined the minimal inhibitory concentrations (MIC) of lysozyme for several Gram-  
98 positive bacteria (Table 1; see S1 Fig for a representative set of MIC assays). *Micrococcus*  
99 *luteus*, used as a reference substrate to define lysozyme activity [20] had an expected very  
100 low MIC of  $5 \times 10^{-4}$  mg ml<sup>-1</sup>. MIC values were higher for all Firmicutes tested. Growth of  
101 several species was inhibited by lysozyme concentrations of 0.0312 mg ml<sup>-1</sup> (*Aerococcus*  
102 *viridans* *Bacillus subtilis*, *Bacillus megaterium* and *Lactobacillus cellobiosus*). *Lactococcus*  
103 *lactis* growth was inhibited by concentrations of 0.125 mg ml<sup>-1</sup>. The MIC of lysozyme for all  
104 pathogens tested was relatively high: 4 mg ml<sup>-1</sup> for *Listeria monocytogenes* and >16 mg ml<sup>-1</sup>  
105 for *Staphylococcus aureus*, and all enterococci and streptococci tested. In *L. monocytogenes*,  
106 lysozyme resistance was largely due to peptidoglycan de-*N*-acetylation. Deletion of the gene  
107 encoding the deacetylase PgdA led to a 32-fold decrease in resistance (MIC=0.125 mg ml<sup>-1</sup>).  
108 Interestingly, abolishing peptidoglycan *O*-acetylation or de-*N*-acetylation in *E. faecalis* only  
109 had a minor impact on lysozyme resistance [16, 19]. The combined deletions in the four  
110 genes contributing to *E. faecalis* lysozyme resistance (*oatA*, *pgdA*, *dltA* and *sigV*; *OPDV*  
111 strain) was required for 10-fold reduction in the MIC of this antimicrobial compound  
112 (0.5 mg ml<sup>-1</sup>). However, the lysozyme MIC for the *OPDV* mutant was still higher than that of  
113 non-pathogenic Gram-positive bacteria.

114

115 **Transposon mutagenesis of the *OPDV epa* variable region confers resistance to**  
116 **lysozyme.**

117 The relatively high lysozyme MIC of the quadruple mutant (*OPDV* strain) prompted us to  
118 further explore *E. faecalis* properties modulating lysozyme activity. We constructed a  
119 transposon mutant library in the *OPDV* background using the *Mariner*-based system  
120 previously described for *E. faecium* [21]. Transposon mutants were selected on agar plates  
121 containing lysozyme at a concentration of 2 mg ml<sup>-1</sup>, four times the MIC for the parental  
122 *OPDV* strain. Approximately  $2 \times 10^5$  mutants were plated and after 24 h incubation at 37°C,  
123 16 mutants forming colonies at this concentration were isolated and further analysed.

124 Mapping the transposon insertion sites revealed that 9 mutants had insertions downstream of  
125 the conserved *epaA-epaR* region encoding the core synthetic apparatus likely required to  
126 produce the enterococcal polysaccharide antigen EPA (Fig 1A) [22]. The region containing

## EPA decoration is essential for virulence

127 the insertions displays genetic variability between strains and was proposed to be responsible  
128 for the decoration of the EPA polysaccharide [22-24]. Mutations were clustered around three  
129 genes encoding putative glycosyltransferases and a homolog of *wcaG*, an  
130 epimerase/dehydratase (Fig 1B).

131 Transposon mutants were complemented to formally establish that the insertions in the *epa*  
132 variable region were responsible for lysozyme resistance. Four plasmids were constructed to  
133 express *OG1RF\_11720*, *OG1RF\_11715* (*epaOX*), *OG1RF\_11714* (*epaX-like*) and  
134 *OG1RF\_11707* under the control of the inducible *tet* promoter. Following transformation into  
135 *E. faecalis*, gene expression was induced in the presence of anhydrotetracycline (ATc) and  
136 the production of his-tagged proteins was checked by western blot (S2 Fig).  
137 Complementation was evaluated by measuring susceptibility to lysozyme (Fig 2). Lysozyme  
138 resistance associated with transposon insertions in genes *OG1RF\_11720*, *OG1RF\_11715*,  
139 *OG1RF\_11714* and *OG1RF\_11707* could be complemented when the disrupted gene was  
140 expressed *in trans*. By contrast, the parental susceptibility to lysozyme could not be restored  
141 when complementation experiments were carried out with plasmids encoding a gene distinct  
142 from the one disrupted (Table 2). Altogether, these experiments confirmed that the resistance  
143 phenotypes of the mutants analysed were due to the disruption of the genes indicated in Fig 1.

144

145

### 146 **Mutations in the *epa* variable region alter the negative surface charge of *E. faecalis* and** 147 **are associated with minor changes in sugar composition.**

148 The impact of *epa* transposon insertions on the production of EPA was investigated.  
149 Polysaccharides were extracted from cultures at the end of exponential growth as previously  
150 described [25]. Similar amounts of EPA were extracted as assessed by neutral sugar assays  
151 and dry weight (between 20 and 30 mg l<sup>-1</sup>). Each purified EPA sample was run on a  
152 polyacrylamide gel and stained with the cationic dye alcian blue (Fig 3A). Whilst *OG1RF*  
153 and *OPDV* polysaccharide bands previously named PS1 and PS2 were present [8], these were  
154 not detected in mutant samples, possibly because the reduced negative charge no longer  
155 allowed EPA to migrate in the gel or no longer allowed these polymers to be stained by  
156 alcian blue. As expected, complementation restored the detection of EPA after staining by  
157 alcian blue (Fig 3A).

158 We tested the impact of the transposon insertions on EPA charge by measuring the  
159 electrophoretic mobility of *E. faecalis* cells using micro-electrophoresis, which allows single  
160 particle tracking (Fig 3B) [26]. *OG1RF* cells displayed a negative electrophoretic mobility

## EPA decoration is essential for virulence

161 (migration towards the anode), even at low pH, indicating a negative surface charge. Despite  
162 the increased susceptibility of *OPDV* cells to lysozyme, the electrophoretic mobility  
163 measured with this strain was not significantly different from the mobility of OG1RF cells at  
164 all pHs tested (Fig 3B; S1 and S2 Table). Three of the four insertion mutants  
165 (*OPDV\_11720::Tn2.5*, *OPDV\_11715::Tn2.13* and *OPDV\_11720::Tn2.8*) displayed similar  
166 electrophoretic mobilities, very distinct from the parental *OPDV* strain. The negative surface  
167 charge of these mutants was significantly reduced as compared to that of the parental *OPDV*  
168 strain (\*\*\*\* $P < 0.0001$  for all pH conditions), the difference being most prominent at pH 3.0  
169 (Fig 3B). As expected, differences between *OPDV*, *OPDV\_11720::Tn2.5*,  
170 *OPDV\_11715::Tn2.13* and *OPDV\_11720::Tn2.8* cells were abolished when the mutations  
171 were complemented. Mutant *OPDV\_11714::Tn2.14* only showed a difference with the  
172 parental *OPDV* strain at pH 2.0 (\*\*\*\* $P < 0.0001$ ). This difference was no longer detected  
173 when the mutation was complemented.

174 Previous studies reported the presence of phosphate in the EPA polysaccharide [25].  
175 Phosphate assays carried out on purified EPAs revealed a significantly lower phosphate  
176 content for all transposon mutants as compared to the parental strain (Fig 3C and S3 Table),  
177 suggesting that the genes from the *epa* variable region are at least in part involved in the  
178 addition of phosphate in this polymer. Collectively, our experiments revealed that several  
179 genes in the *epa* variable region contribute to the negative charge of *E. faecalis* cell surface.

180 To confirm that the lack of detection of EPA on polyacrylamide gels was due to a loss of  
181 negatively charged groups rather than a lack of rhamnopolysaccharide production, we carried  
182 out carbohydrate composition analyses on purified EPA. As anticipated, EPA composition  
183 was very similar in OG1RF and *OPDV* strains; rhamnose, glucose, *N*-acetylglucosamine  
184 (GlcNac) and *N*-acetylgalactosamine (GalNac) accounted for approximately 95% of the  
185 sugars identified (*ca.* 30%, 30%, 20% and 15%, respectively) and galactose was found in  
186 limited amounts (5%). The proportion of glucose and GlcNac remained similar to parental  
187 *OPDV* levels in all *epa* mutants, whilst both GalNac and galactose amounts decreased to an  
188 increase of rhamnose. Interestingly, these changes were different depending on the mutant  
189 considered. For example, EPA extracted from *OPDV\_11718::Tn2.8* was the only mutant  
190 EPA that still contained some galactose. The relative proportion of rhamnose increased in all  
191 mutants. GalNac content decreased dramatically in all mutant EPA and could not be detected  
192 in *OPDV\_11715::Tn2.13*.

193

EPA decoration is essential for virulence

194 **NMR analyses reveal that the *epa* variable region contributes to minor modifications of**  
195 **the EPA polysaccharide.**

196 To gain further insight into the contribution of *epa* variable genes to the structure of EPA, we  
197 carried out NMR analyses on purified polysaccharides. The 1D proton NMR spectra of all  
198 polysaccharides were overall similar but mutations in the *epa* variable region were associated  
199 with modifications in the anomeric region (Fig 4A). Clear differences were also detected in  
200 the relative intensities of methyl protons in the mutant spectra. For all mutants, the intensity  
201 of *N*-acetyl signals (1.9-2.2 ppm) decreased whilst the intensity of methyl protons  
202 corresponding to rhamnose residues (1.2-1.6 ppm) increased, suggesting a lower content of  
203 hexosamine in mutant EPAs and a relative increase of rhamnose. This result is in agreement  
204 with the carbohydrate analyses following acid hydrolysis (Fig 3D and S3 Fig). <sup>1</sup>H-<sup>13</sup>C HSQC  
205 spectra revealed that EPA has a very complex structure, as evidenced by the detection of over  
206 30 signals in the anomeric region (Fig 4B). The comparison of 2D spectra corresponding to  
207 *OPDV* and mutant polysaccharides revealed that each *epa* mutation only led to a limited  
208 number of changes including changes in the signal intensity, signal shifts and disappearance  
209 (S4 Fig). The number and the nature of the signals affected in the *epa* mutants were different  
210 depending on the mutation considered. Altogether, NMR and sugar analyses supported the  
211 idea that the *epa* variable genes are involved in limited modifications of the EPA  
212 rhamnopolysaccharide previously described as “decorations”.

213

214 **Epa decoration determines susceptibility to antimicrobials targeting the cell envelope.**

215 All *epa* transposon insertions were combined with four other mutations present in the in  
216 *OPDV* strain (*oatA*, *pgdA*, *dltA* and *sigV*), leaving the possibility of epistatic interactions  
217 between these mutations. To avoid this potential issue, we built in-frame *epa* deletions in the  
218 OG1RF genetic background (S5 Fig) before testing the impact of EPA decorations on  
219 resistance to antimicrobials targeting the cell envelope (Fig 5). All *epa* mutants were more  
220 sensitive to SDS than OG1RF, mutants  $\Delta 11714$  and  $\Delta 11707$  being less sensitive than the two  
221 others. Interestingly, mutant  $\Delta 11714$  ( $\Delta epaX$ -like) was the only one that did not display  
222 increased susceptibility to sodium cholate, a primary bile salt. Mutant  $\Delta 11720$  was the only  
223 one with an increased susceptibility to both polymyxin B and nisin, two cationic peptides  
224 targeting the cell envelope. Mutants  $\Delta 11707$  and  $\Delta 11715$  were more susceptible to polymyxin  
225 B than the wild-type strain, but barely more susceptible to nisin. Finally, deletion of



## EPA decoration is essential for virulence

226 *OG1RF\_11714* had no detectable impact on resistance to either of the CAMPs tested. Taken  
227 together, these results indicated that genes in the *epa* variable region are required for  
228 resistance to antimicrobials targeting the cell envelope.

229

### 230 **The decoration of the EPA rhamnopolysaccharide is essential for virulence and** 231 **underpins phagocyte evasion.**

232 The impact of *epa* mutations on *E. faecalis* virulence was tested in the zebrafish experimental  
233 model of infection (Fig 6). Cell suspensions corresponding to approximately 1,200 CFUs  
234 were injected in the bloodstream of LWT embryos 30 h post fertilization (hpf) and the  
235 survival of larvae was monitored for 90 h post infection (hpi). As a preliminary experiment,  
236 we analysed the virulence of the *OPDV* transposon mutants (S6 Fig). Each *epa* transposon  
237 mutant had a significantly reduced virulence as compared to the wild-type OG1RF strain.  
238 Even though the combined deletions in *oatA*, *pgdA*, *dltA* and *sigV* did not impair the  
239 virulence of *E. faecalis* in the zebrafish model of infection (S7 Fig), we could not exclude the  
240 possibility of an epistatic relation between the *OPDV* and *epa* mutations. We therefore  
241 repeated the zebrafish infections using the in-frame *epa* deletion mutants in the wild-type  
242 OG1RF genetic background (S5 Fig). All *epa* mutants showed a significant decrease in  
243 virulence as compared to the wild-type OG1RF (Fig 6), killing only between 0-10% of the  
244 larvae as opposed to the 40 to 55% of killing following injection of the wild-type strain; Fig  
245 6A-D). As expected, the complementation of each *epa* deletion fully restored the virulence.  
246 Although the *epa* deletion mutants (except the  $\Delta epaX$ -like strain) present a slight defect in  
247 their growth rate, it is unlikely that this accounts for the lack of virulence; all complemented  
248 strains (and the wild-type OG1RF harbouring an empty complementation vector) also present  
249 a growth defect (S8 Fig) and yet kill zebrafish larvae as well as the wild-type strain (Fig 6).

250 The production of EPA has been associated with an increased resistance to phagocytosis,  
251 which represents a key step during pathogenesis [8, 27]. We therefore quantified  
252 phagocytosis in zebrafish larvae infected with the wild-type OG1RF and one representative  
253 *epa* mutant (*OG1RF\_Δ11714*, *epaX*-like) expressing the red fluorescent protein mCherry (Fig  
254 7). Confocal microscopy images were used to measure bacterial uptake by phagocytes  
255 labelled with anti L-plastin antibodies coupled to Alexa-488, a green fluorophore, as  
256 previously described [28]. The ratio between red fluorescence inside to red fluorescence  
257 outside phagocytes was significantly higher for the *epaX*-like mutant (*OG1RF\_Δ11714*) than  
258 for the wild-type strain (\*\**P*=0.0006) or the complemented strain (OG1RF  $\Delta 11714$  +

## EPA decoration is essential for virulence

259 pTetH-*OGIRF\_11714*; \*\* $P = 0.0049$ ). As expected, no difference in phagocytosis was  
260 observed between the wild-type and complemented strains (ns,  $P > 0.05$ ) (Fig 7A).  
261 Representative pictures shown in Fig 7B-D clearly indicate that unlike the wild-type strain,  
262 the *epaX-like* mutant was no longer able to evade phagocytes.

263 Altogether, our data therefore indicate that decoration of the EPA polysaccharide is essential  
264 for *E. faecalis* pathogenesis.

265

### 266 Discussion

267 Previous studies revealed that *E. faecalis* resistance to lysozyme is unusually complex and  
268 results from several mechanisms acting synergistically. These include peptidoglycan *O*-  
269 acetylation and de-*N*-acetylation, D-alanylation of teichoic acids and transcriptional control  
270 by the extracytoplasmic sigma factor SigV. Despite a 100-fold decrease as compared to the  
271 wild-type strain, the residual resistance of the quadruple *OPDV* mutant is still relatively high  
272 (MIC=0.5 mg ml<sup>-1</sup>) as compared to other Firmicutes. This result contrasts with other bacteria  
273 in which a limited number of genes play a key role in resistance. For example, the combined  
274 deletions of *oatA* and *dltA* in *S. aureus* led to a decrease of at least 2,000-fold in resistance as  
275 compared to parental strain [13]. Deletion of *pgdA* alone in *L. monocytogenes* is associated  
276 with a 32-fold decrease resistance.

277 Using random transposon mutagenesis, we showed that several genes located downstream the  
278 conserved *epaA-epaR* region modulate susceptibility to lysozyme. It was proposed that *epaA*-  
279 *epaR* encode a core synthetic machinery whilst downstream genes contribute to the  
280 decoration of EPA rhamnopolysaccharide [22, 24]. In agreement with previous studies, three  
281 distinct polysaccharide bands (named PS1, PS2 and PS3) were detected on polyacrylamide  
282 gels ([8] and Fig 3A). The two upper bands simultaneously disappeared in all the transposon  
283 mutants, suggesting that both are structurally related to EPA. The nature of the third band is  
284 unknown and could be either a metabolic intermediate of EPA or an unrelated polymer. The  
285 lack of detection of PS1 and PS2 in EPA polysaccharides from mutants suggested that either  
286 their charge did not allow them to enter the gel and/or that they were no longer stained by the  
287 cationic dye alcian blue. A similar result was previously described for mutants harbouring  
288 deletions in *OGIRF\_11715* (*epaOX*) [23] and the homolog of *OGIRF\_11714* in V583 (*epaX*)  
289 [24]. By comparing the electrophoretic mobility of the transposon mutants to that of the  
290 parental *OPDV* strain, we confirmed that the *epa* genes downstream of the *epaA-epaR* locus  
291 contribute to the negative charge of the EPA polysaccharide. This negative charge is at least  
292 in part due to the presence of phosphate in the polymer. Interestingly, the *OGIRF* and *OPDV*

## EPA decoration is essential for virulence

293 strains displayed similar electrophoretic mobilities. Previous studies also showed that  
294 alanylation of teichoic and/or lipoteichoic acids in *L. lactis* had no detectable impact on the  
295 electrophoretic mobility of this organism [29]. The *dlt* operon has been shown to modify  
296 lipoteichoic acids [17]. Since these polymers are embedded inside the cell wall, it is likely  
297 that their modification does not lead to a change in the bacterial surface charge. Further  
298 experiments are required to test whether alanylation of cell wall polymers only has a  
299 moderate impact on the charge of the cell wall or if such modifications can simply not be  
300 detected by measuring electrophoretic mobility. Three of the mutants identified in this work  
301 carry a transposon in genes encoding putative glycosyl transferases. Despite the low amino  
302 acid identity between the glycosyl transferase sequences (19-27% depending on the  
303 comparison), these proteins have very similar predicted secondary structures, with two  
304 transmembrane domains and both the N- and C-termini exposed at the cell surface. Tertiary  
305 structure predictions suggest that all 3 proteins have a very similar fold and are GalNAc  
306 transferases. These predictions are in agreement with our NMR and sugar analyses indicating  
307 that EPA polysaccharides from all glycosyl transferase mutants (*OPDV\_11720*,  
308 *OPDV\_11715* and *OPDV\_11714*) contain less GalNAc and less intense *N*-acetyl proton  
309 signals. In addition to a reduced amount of GalNAc, EPA polymers from the glycosyl  
310 transferase mutants also contained a reduced amount of galactose. Further analyses are  
311 required to explore the catalytic activity of these glycosyl hydrolases. It remains unclear  
312 whether they can use distinct sugars as a substrate or if the addition of GalNAc is required for  
313 the activity of other glycosyl transferases adding Gal residues. Since none of the heterologous  
314 complementations of the transposon mutants were able to restore the parental phenotype, we  
315 anticipate that the 3 glycosyl transferases identified play distinct roles. This idea is supported  
316 by several independent observations: (i) mutants *OPDV\_11720::Tn2.5*,  
317 *OPDV\_11715::Tn2.13* and *OPDV\_11714::Tn2.14* present distinct alterations in their EPA  
318 carbohydrate compositions and the deletion mutants present differences in their antimicrobial  
319 susceptibility profiles; (ii) 2D-NMR spectra indicate that each mutation is associated with  
320 distinct modifications of the signals in the anomeric region; (iii) the *OPDV\_11714::Tn2.14*  
321 (*epaX-like*) mutant behaved differently from the other *epa* mutants studied since it displayed  
322 a less pronounced defect in surface charge. Altogether, our results suggest that  
323 glycosyltransferases in the *epa* variable region fulfil distinct roles. The complexity of EPA  
324 structure precludes any conclusion about the specific role of individual *epa* genes. However,  
325 based on the 2D NMR spectra, it is tempting to assume that *OGIRF\_11720*, the first gene of

## EPA decoration is essential for virulence

326 the *epa* variable region encodes a glycosyl transferase that is adding the entire EPA  
327 decorations, whilst EpaOX and EpaX contribute to the transfer of smaller decorations.  
328 *epa* deletion mutants displayed distinct resistance to antimicrobials targeting the cell  
329 envelope. Deletion of *OG1RF\_11720*, which had the most pronounced impact on EPA  
330 structure led to the most pronounced increased susceptibility to antimicrobials. Deletion of  
331 *OG1RF\_11714* (*epaX*), which had the least pronounced impact on EPA structure only led to  
332 an increased susceptibility to SDS. Since *epa* mutations could confer resistance to both  
333 negatively charged antimicrobials and CAMPs, these results suggested that the charge of  
334 EPA does not entirely account for the resistance to these compounds. We therefore speculate  
335 that EPA decorations are critical to maintain cell integrity, as previously suggested [23, 24].  
336 A contribution of *epa* decoration genes in biofilm formation [30], resistance to antimicrobials  
337 [23] and colonisation [24] was previously suggested, but no information was available on a  
338 potential role in the context of pathogeny. *E. faecalis* pathogenesis in the zebrafish model of  
339 infection involves two critical steps: phagocyte evasion and tissue damage caused by the  
340 metalloprotease GeIE [27]. Since *oatA*, *pgdA*, *dltA* and *sigV* are unlikely to contribute to these  
341 processes, it was expected that their simultaneous deletion would have a very limited impact  
342 on virulence. By contrast, EPA has been reported to mediate resistance to phagocytic killing  
343 [8] and plays a critical role in virulence both in experimental mouse and zebrafish infections  
344 [27, 31]. We therefore hypothesized that *epa* mutations altering the decoration of EPA would  
345 impair virulence. In agreement with this hypothesis, all *epa* transposon mutants (in the *OPDV*  
346 background) and in-frame deletions in the wild-type *OG1RF* background were avirulent in  
347 the zebrafish model of infection. Further investigations revealed that the *epaX* mutation leads  
348 to a significant increase in *E. faecalis* uptake by phagocytes, suggesting that the decoration of  
349 EPA mediates immune evasion and underpins virulence.

350 Collectively, the results provide a paradigm shift in our understanding of *E. faecalis*  
351 pathogenesis, revealing that the modifications of EPA, rather than EPA backbone itself,  
352 underpin phagocyte evasion, an essential step during host infection. Whether *epa* is directly  
353 recognized by the host immune system or is shielding other surface components remains an  
354 open question.

355

356 **Materials and methods**

357

358 **Ethics statement**

359 Animal work was carried out according to guidelines and legislation set out in UK law in the  
360 Animals (Scientific Procedures) Act 1986 under Project License P1A417A5E. Ethical  
361 approval was granted by the University of Sheffield Local Ethical Review Panel.

362

363 **Bacterial strains, plasmids and growth conditions.**

364 Bacterial strains, plasmids and oligonucleotides used in this study are described in S4 Table.  
365 All strains were routinely grown at 37°C in Brain Heart Infusion (BHI) broth or BHI-agar  
366 1.5 % (w/v) plates unless otherwise stated. For *E. coli*, erythromycin was added at a final  
367 concentration of 200 µg ml<sup>-1</sup> to select pTetH derivatives. When necessary, *E. faecalis* was  
368 grown in the presence of 10 µg ml<sup>-1</sup> chloramphenicol, 128 µg ml<sup>-1</sup> gentamicin or 30 µg ml<sup>-1</sup>  
369 erythromycin. For complementation experiments, anhydrotetracycline was used at a final  
370 concentration of 10 ng ml<sup>-1</sup> to induce gene expression.

371

372 **Construction of the *OPDV* strain.**

373 The work describing the contribution of *oatA*, *pgdA*, *dltA* and *sigV* to lysozyme resistance  
374 was carried out using *E. faecalis* JH2-2 as a genetic background [16, 19]. Since this  
375 laboratory strain is avirulent in the zebrafish model of infection, we decided to use OG1RF as  
376 a parental strain [32]. The quadruple OG1RF mutant harbouring deletions in *oatA*, *pgdA*, *dltA*  
377 and *sigV* was built using existing plasmids (S4 Table) to create in-frame deletions in the  
378 following order: *oatA*, *pgdA*, *dltA* and *sigV*.

379

380 **Transposon mutagenesis.**

381 A *Mariner*-based transposon mutagenesis system previously described was used [21].  
382 Plasmid pZXL5 was introduced in *E. faecalis* *OPDV* by electroporation and transformants  
383 were selected at 28°C on plates containing chloramphenicol and gentamicin. Cells harbouring  
384 pZXL5 were grown to mid-exponential phase at 28°C and transposition was induced by  
385 addition of nisin (25 ng ml<sup>-1</sup>). The culture was then transferred to 42°C overnight to counter-  
386 select the replication of the plasmid. The library was then amplified by growing the cells at  
387 42°C in the presence of gentamicin.

388

389 **Transposon mutagenesis.**

EPA decoration is essential for virulence

390 A *Mariner*-based transposon mutagenesis system previously described was used [21].  
391 Plasmid pZXL5 was introduced in *E. faecalis* OPDV by electroporation and transformants  
392 were selected at 28°C on plates containing chloramphenicol and gentamicin. Cells harbouring  
393 pZXL5 were grown to mid-exponential phase at 28°C and transposition was induced by  
394 addition of nisin (25 ng ml<sup>-1</sup>). The culture was then transferred to 42°C overnight to counter-  
395 select the replication of the plasmid. The library was then amplified by growing the cells at  
396 42°C in the presence of gentamicin.

397

#### 398 **Isolation of transposon mutants resistant to lysozyme.**

399 Serial dilutions of the transposon library were plated on BHI agar plates containing 1, 2 or 4  
400 times the lysozyme MIC for the OPDV strain (0.5 mg ml<sup>-1</sup>) and gentamicin. After 24 to 48 h  
401 at 42°C, individual colonies growing at the highest concentration (2 mg ml<sup>-1</sup>) were chosen for  
402 further characterisation.

403

#### 404 **Mapping transposition sites.**

405 Transposon insertion sites were mapped by reverse PCR using two divergent primers  
406 (Mar\_up and Mar\_dn) on the transposon (S9A Fig). Chromosomal DNA was extracted using  
407 the Promega Wizard kit and digested by SspI in a final volume of 30 µl at a concentration of  
408 4 ng µl<sup>-1</sup> (S9B Fig). Digestion products were further diluted to 1 ng µl<sup>-1</sup> and self-ligated at  
409 16°C for 16 h after addition of 100 U of T4 DNA ligase (NEB) (S9C Fig). Three microliters  
410 of the ligation product were used as a template for PCR amplification using oligonucleotides  
411 Mar\_up and Mar\_dn (S9D Fig). PCR products were gel extracted and sequenced using  
412 oligonucleotide T7 (S9E Fig). The insertion site was defined as the first nucleotide of the *E.*  
413 *faecalis* OG1RF genome immediately downstream of the inverted repeat sequence flanking  
414 the transposon.

415

#### 416 **Construction of complementation plasmids.**

417 DNA fragments encoding OG1RF\_11720, OG1RF\_11715, OG1RF\_11714 and  
418 OG1RF\_11707 were amplified by PCR using the oligonucleotides described in S4 Table.  
419 PCR products were digested by NcoI and BamHI and cloned into pTetH, a pAT18 derivative  
420 allowing anhydrotetracycline-inducible expression (S. Mesnage, unpublished). Each open  
421 reading frame was fused to a C-terminal 6-Histidine tag.

422

#### 423 **Antimicrobial assays.**

## EPA decoration is essential for virulence

424 Colonies from a BHI agar plate were resuspended in PBS and diluted to an OD of 1 at  
425 600 nm. Ten-fold dilutions were prepared in PBS and 1.5  $\mu$ l of each cell suspension were  
426 spotted on BHI agar containing antimicrobials at various concentrations. MICs of lysozyme  
427 were defined as the concentration of antimicrobial inhibiting the growth of 1.5  $\mu$ l of a cell  
428 suspension corresponding to a 1000-fold dilution of the cell suspension at OD of 1 at 600 nm.  
429 For complementation experiments, anhydrotetracycline was added at a final concentration of  
430 10 ng ml<sup>-1</sup>. At least two biological replicates were carried out for each susceptibility assay.

431

### 432 **Measurement of electrophoretic mobility.**

433 An overnight culture was diluted 1000-fold in 25 ml of BHI broth and grown for 17 h at 37°C  
434 in static conditions. Anhydrotetracycline (100 ng ml<sup>-1</sup>) was added to all cultures to induce  
435 gene expression for complementation and exclude the possibility that this chemical could  
436 account for differences between strains. Cells were harvested by centrifugation (5 min,  
437 8,000 x g at room temperature), washed twice in 25 ml of 1.5 mM NaCl and resuspended at a  
438 concentration of 3.10<sup>7</sup> CFU ml<sup>-1</sup> in 1.5 mM NaCl at various pHs. The electrophoretic mobility  
439 was measured in an electric field of 8V cm<sup>-1</sup> using a laser zetaphoremeter (CAD  
440 Instrumentation, Les Essarts le Roy, France). For each measurement, results were based on  
441 the analysis of 200 individual particles. The results presented in Fig 3, S1 and S2 Tables are  
442 the combined results of three independent experiments (biological replicates).

443

### 444 **NMR.**

445 NMR experiments were conducted on a Bruker DRX-600 (plus cryoprobe) spectrometer at  
446 25°C. EPA polysaccharides were freeze-dried and resuspended in D<sub>2</sub>O. Spectra were  
447 processed and analysed using TOPSPIN (version 2.1). Trimethylsilylpropanoic acid was used  
448 as a reference.

449

### 450 **Carbohydrate extraction and analyses.**

451 EPA was extracted as previously described from standing cultures in BHI at the end of  
452 exponential growth (OD<sub>600nm</sub>=0.8) [25]. The method previously described to analyse  
453 pneumococcal polysaccharides and conjugates was followed, with the exception of the first  
454 acid hydrolysis step [33] Briefly, purified EPA polysaccharides were hydrolyzed in 4 N  
455 trifluoroacetic acid for 4 h at 100°C. Hydrolysis products were analysed by high-performance  
456 anion-exchange chromatography (HPAEC) coupled to pulsed-amperometric detection (PAD)  
457 using a Dionex DX 500 BioLC system (ThermoFisher). Monosaccharides were separated on

EPA decoration is essential for virulence

458 a Carbowac PA10 (4 mm × 250 mm) analytical column (ThermoFisher Scientific) at a flow  
459 rate of 1 ml min<sup>-1</sup>. Solvent A was 18 mM NaOH, solvent B was 100 mM NaOH, and solvent  
460 C was 100 mM NaOH containing 1 M sodium acetate. NaOH and NaAc gradients were used  
461 simultaneously to elute the carbohydrates by mixing the three eluents. The gradients used  
462 were as follows: after 15 min of isocratic elution in buffer A, a 3 min gradient to 100 % of  
463 buffer B was applied. A second gradient was applied between 18 and 35 min using buffer C  
464 to reach 300 mM sodium acetate. The column was re-equilibrated in 18 mM NaOH for 20  
465 min after every run. The following pulse potentials and durations were used:  $E1 = 0.1V$ ,  $t1 =$   
466  $400\text{ ms}$ ;  $E2 = -2V$ ,  $t2 = 20\text{ ms}$ ;  $E3 = 0.6V$ ,  $t3 = 10\text{ ms}$ ;  $E4 = -0.1V$ ,  $t4 = 70\text{ ms}$ . Data were  
467 collected and analysed on computers equipped with the Dionex PeakNet software.  
468 Carbohydrate analyses were made in triplicate using three independent EPA extractions from  
469 3 distinct colonies.

470

#### 471 **Phosphate assays.**

472 Phosphate content was determined as described previously [34]. 30 µl of 10 % (m/v)  
473 Mg(NO<sub>3</sub>)<sub>2</sub> in 35 % (v/v) methanol was added to 120 µl containing EPA samples at a  
474 concentration of 1 mg ml<sup>-1</sup> in pyrex test tubes. After drying the organic material over a  
475 flame, 600 µl of 0.5 N HCl was added and the sample was heated for 15 min at 100°C. At  
476 this stage, 1.4 ml of a mixture containing a 1:6 ratio of 10 % (m/v) ascorbic acid and 0.42 %  
477 (m/v) of (NH<sub>4</sub>)<sub>2</sub>MoO<sub>4</sub>•H<sub>2</sub>O in 1 N H<sub>2</sub>SO<sub>4</sub> was added. Absorbance at 820 nm was read after  
478 an incubation of 1 h at 37°C and phosphate content was determined in reference to a solution  
479 of inorganic phosphate.

480

#### 481 **Construction of pGhost derivatives for allele replacement**

482 All plasmids for allele replacement were constructed with the same strategy. Two homology  
483 regions were amplified: the 5' homology region (referred to as H1) was amplified with  
484 oligonucleotides H11 (sense) and H12 (antisense). The 3' homology region (referred to as  
485 H2) was amplified with oligonucleotides H21 (sense) and H22 (antisense). Both PCR  
486 products were purified, mixed in an equimolar ratio and fused by overlap extension using  
487 oligonucleotides H11 and H22 [35]. The assembled PCR fragment flanked by two restriction  
488 sites was digested and cloned into pGhost9 [36] similarly digested. Oligonucleotide  
489 sequences and restriction sites used for cloning are described in S4 Table.

490

#### 491 **Construction of *E. faecalis* OG1RF in-frame *epa* mutants**



EPA decoration is essential for virulence

492 Isogenic derivatives of *E. faecalis* OG1RF were constructed by allele exchange using the  
493 procedure previously described [37]. Briefly, pGhost9 derivatives were electroporated into  
494 OG1RF and transformants were selected at a permissive temperature (28°C) on BHI plates  
495 with erythromycin. To induce single crossover recombination, transformants were grown at a  
496 non-permissive temperature (42°C) in the presence of erythromycin. The second  
497 recombination event leading to plasmid excision was obtained after 5 serial subcultures at  
498 28°C without erythromycin. The last overnight subculture was plated at 42°C without  
499 erythromycin. A clone harboring a double crossover mutation was identified by PCR (S5 Fig)  
500 and further confirmed by sequencing of the recombined region.

501

### 502 **Zebrafish strains and maintenance.**

503 London wild type (LWT) zebrafish were provided by the aquarium facility at the University  
504 of Sheffield. Embryos were maintained in E3 medium at 28°C according to standard  
505 procedures previously described [38].

506

### 507 **Microinjections of *E. faecalis* in zebrafish embryos.**

508 Cells were grown to mid-exponential phase ( $OD_{600nm} \sim 0.3$ ) and harvested by centrifugation  
509 (5,000 x g for 10 min at room temperature). Bacteria were resuspended in filtered phosphate  
510 buffer saline (150 mM  $Na_2HPO_4$ , 20 mM  $KH_2PO_4$ , 150 mM NaCl [pH 7.5], PBS) and  
511 transferred to microcapillary pipettes. Embryos at 30 h post fertilization (hpf) were  
512 anaesthetized, dechorionated, embedded in 3 % (w/v) methylcellulose and injected  
513 individually with 2 nl of a cell suspension corresponding to *ca.* 1,000 cells as previously  
514 described [27]. The number of cells injected was checked before and after each series of  
515 injections with a given strain. Zebrafish embryos were monitored at regular intervals until  
516 90 h post infection (hpi). At least 20 embryos per group were used.

517

### 518 **Imaging of infected larvae by confocal microscopy and quantification of uptake by** 519 **phagocytes.**

520 Immuno-labelled embryos were immersed in 0.8 % (w/v) low melting point agarose in E3  
521 medium and mounted flat on FluoroDish<sup>TM</sup> (World Precision Instruments Inc.). Images were  
522 collected using a DMI8 confocal microscope (Leica). Image acquisition was performed with  
523 the Volocity software and the images were processed with ImageJ 1.49v software. Bacterial  
524 phagocytosis was quantified using an ImageJ custom script called Fish Analysis, which can  
525 be obtained from <http://sites.imagej.net/Willemsejj/> or via ImageJ updater. All bacteria were

EPA decoration is essential for virulence

526 identified based on their fluorescence (mCherry, Channel 2). Subsequently, the fluorescence  
527 intensity of the phagocytes (Alexa 488, Channel 1) surrounding the phagocytosed bacteria  
528 was measured. The phagocytosed bacteria had high fluorescence intensity of Channel 2 and  
529 low fluorescence intensity of Channel 1. The area of phagocytosed bacteria was compared  
530 with the area of non-phagocytosed bacteria and their ratio was calculated.

531

### 532 **Statistical analyses.**

533 Statistical analyses were performed using GraphPad Prism version 7.03. Comparisons  
534 between survival curves were made using the log rank (Mantel-Cox) test. Electrophoretic  
535 mobilities were compared using two-way ANOVA. Phosphate contents were compared using  
536 an unpaired *t*-test with Welch's correction. Comparison of uptake by zebrafish macrophages  
537 was carried out using an unpaired non-parametric Dunn's multiple comparison test.

538

539

### 540 **Acknowledgments**

541 The authors would like to thank Abdellah Benachour (University of Caen) for providing the  
542 plasmids used to construct the *OPDV* strain and the Bateson Centre aquaria staff for their  
543 assistance with zebrafish husbandry. The authors thank Dr Philip Elks for access to the  
544 confocal microscope and Paul Martin (University of Bristol) for the kind gift of anti L-plastin  
545 antibodies.

## References

546

547

548

549

550

551

552

553

554

555

556

557

558

559

560

561

562

563

564

565

566

567

568

569

570

571

572

573

574

575

576

577

578

579

580

581

582

583

584

585

586

587

588

589

590

591

592

593

594

595

596

597

598

599

1. Arias CA, Murray BE. The rise of the *Enterococcus*: beyond vancomycin resistance. *Nat Rev Microbiol.* 2012;10(4):266-278. doi: 10.1038/nrmicro2761. pmid: 22421879.
2. Sassoubre LM, Ramsey MM, Gilmore MS, Boehm AB. Transcriptional response of *Enterococcus faecalis* to sunlight. *J Photochem Photobiol B.* 2014;130:349-356. doi: 10.1016/j.jphotobiol.2013.12.013. pmid: 24434819.
3. Ocvirk S, Sava IG, Lengfelder I, Lagkouvardos I, Steck N, Roh JH, et al. Surface-associated lipoproteins link *Enterococcus faecalis* virulence to colitogenic activity in IL-10-deficient mice independent of their expression levels. *PLoS Pathog.* 2015;11(6):e1004911. doi: 10.1371/journal.ppat.1004911. pmid: 26067254.
4. Wang X, Yang Y, Huycke MM. Microbiome-driven carcinogenesis in colorectal cancer: Models and mechanisms. *Free Radic Biol Med.* 2017;105:3-15. doi: 10.1016/j.freeradbiomed.2016.10.504. pmid: 27810411.
5. Hancock LE, Perego M. Systematic inactivation and phenotypic characterization of two-component signal transduction systems of *Enterococcus faecalis* V583. *J Bacteriol.* 2004;186(23):7951-7958. pmid: 15547267.
6. Guzman Prieto AM, van Schaik W, Rogers MR, Coque TM, Baquero F, Corander J, et al. Global emergence and dissemination of enterococci as nosocomial pathogens: attack of the clones? *Front Microbiol.* 2016;7:788. doi: 10.3389/fmicb.2016.00788. pmid: 27303380.
7. Geiss-Liebisch S, Rooijackers SH, Beczala A, Sanchez-Carballo P, Kruszynska K, Repp C, et al. Secondary cell wall polymers of *Enterococcus faecalis* are critical for resistance to complement activation via mannose-binding lectin. *J Biol Chem.* 2012;287(45):37769-37777. doi: 10.1074/jbc.M112.358283. pmid: 22908219.
8. Teng F, Jacques-Palaz KD, Weinstock GM, Murray BE. Evidence that the enterococcal polysaccharide antigen gene (epa) cluster is widespread in *Enterococcus faecalis* and influences resistance to phagocytic killing of *E. faecalis*. *Infect Immun.* 2002;70(4):2010-2015. pmid: 11895965.
9. Thurlow LR, Thomas VC, Hancock LE. Capsular polysaccharide production in *Enterococcus faecalis* and contribution of CpsF to capsule serospecificity. *J Bacteriol.* 2009;191(20):6203-6210. doi: 10.1128/JB.00592-09. pmid: 19684130.
10. Aine E, Morsky P. Lysozyme concentration in tears--assessment of reference values in normal subjects. *Acta Ophthalmol (Copenh).* 1984;62(6):932-938. pmid: 6395619.
11. Hankiewicz J, Swierczek E. Lysozyme in human body fluids. *Clin Chim Acta.* 1974;57(3):205-209. pmid: 4434640.
12. Callewaert L, Michiels CW. Lysozymes in the animal kingdom. *J Biosci.* 2010;35(1):127-160. pmid: 20413917.
13. Herbert S, Bera A, Nerz C, Kraus D, Peschel A, Goerke C, et al. Molecular basis of resistance to muramidase and cationic antimicrobial peptide activity of lysozyme in staphylococci. *PLoS Pathog.* 2007;3(7):e102. pmid: 17676995.
14. Ibrahim HR, Thomas U, Pellegrini A. A helix-loop-helix peptide at the upper lip of the active site cleft of lysozyme confers potent antimicrobial activity with membrane permeabilization action. *J Biol Chem.* 2001;276(47):43767-43774. doi: 10.1074/jbc.M106317200. pmid: 11560930.
15. Hebert L, Courtin P, Torelli R, Sanguinetti M, Chapot-Chartier MP, Auffray Y, et al. *Enterococcus faecalis* constitutes an unusual bacterial model in lysozyme resistance. *Infect Immun.* 2007;75(11):5390-5398. doi: IAI.00571-07 [pii] 10.1128/IAI.00571-07. pmid: 17785473.
16. Benachour A, Ladjouzi R, Le Jeune A, Hebert L, Thorpe S, Courtin P, et al. The lysozyme-induced peptidoglycan *N*-acetylglucosamine deacetylase PgdA (EF1843) is required for *Enterococcus faecalis* virulence. *J Bacteriol.* 2012;194(22):6066-6073. doi: 10.1128/JB.00981-12. pmid: 22961856.
17. Fabretti F, Theilacker C, Baldassarri L, Kaczynski Z, Kropec A, Holst O, et al. Alanine esters of enterococcal lipoteichoic acid play a role in biofilm formation and resistance to antimicrobial peptides. *Infect Immun.* 2006;74(7):4164-4171. doi: 10.1128/IAI.00111-06. pmid: 16790791.

EPA decoration is essential for virulence

- 600 18. Benachour A, Muller C, Dabrowski-Coton M, Le Breton Y, Giard JC, Rince A, et al. The  
601 *Enterococcus faecalis* sigV protein is an extracytoplasmic function sigma factor contributing to  
602 survival following heat, acid, and ethanol treatments. J Bacteriol. 2005;187(3):1022-1035. doi:  
603 187/3/1022 [pii] 10.1128/JB.187.3.1022-1035.2005. pmid: 15659680.
- 604 19. Le Jeune A, Torelli R, Sanguinetti M, Giard JC, Hartke A, Auffray Y, et al. The  
605 extracytoplasmic function sigma factor SigV plays a key role in the original model of lysozyme  
606 resistance and virulence of *Enterococcus faecalis*. PLoS ONE. 2010;5(3):e9658. doi:  
607 10.1371/journal.pone.0009658. pmid: 20300180.
- 608 20. McKenzie HA, White FH, Jr. Determination of lysozyme activity at low levels with emphasis on  
609 the milk enzyme. Anal Biochem. 1986;157(2):367-374. pmid: 3777441.
- 610 21. Zhang X, Paganelli FL, Bierschenk D, Kuipers A, Bonten MJ, Willems RJ, et al. Genome-wide  
611 identification of ampicillin resistance determinants in *Enterococcus faecium*. PLoS Genet.  
612 2012;8(6):e1002804. doi: 10.1371/journal.pgen.1002804. pmid: 22761597.
- 613 22. Palmer KL, Godfrey P, Griggs A, Kos VN, Zucker J, Desjardins C, et al. Comparative genomics  
614 of enterococci: variation in *Enterococcus faecalis*, clade structure in *E. faecium*, and defining  
615 characteristics of *E. gallinarum* and *E. casseliflavus*. MBio. 2012;3(1):e00318-00311. doi:  
616 10.1128/mBio.00318-11. pmid: 22354958.
- 617 23. Dale JL, Cagnazzo J, Phan CQ, Barnes AM, Dunny GM. Multiple roles for *Enterococcus*  
618 *faecalis* glycosyltransferases in biofilm-associated antibiotic resistance, cell envelope integrity,  
619 and conjugative transfer. Antimicrob Agents Chemother. 2015;59(7):4094-4105. doi:  
620 10.1128/AAC.00344-15. pmid: 25918141.
- 621 24. Rigottier-Gois L, Madec C, Navickas A, Matos RC, Akary-Lepage E, Mistou MY, et al. The  
622 surface rhamnopolysaccharide epa of *Enterococcus faecalis* is a key determinant of intestinal  
623 colonization. J Infect Dis. 2015;211(1):62-71. doi: 10.1093/infdis/jiu402. pmid: 25035517.
- 624 25. Hancock LE, Gilmore MS. The capsular polysaccharide of *Enterococcus faecalis* and its  
625 relationship to other polysaccharides in the cell wall. Proc Natl Acad Sci U S A.  
626 2002;99(3):1574-1579. doi: 10.1073/pnas.032448299 99/3/1574 [pii]. pmid: 11830672.
- 627 26. Briandet R, Meylheuc T, Maher C, Bellon-Fontaine MN. *Listeria monocytogenes* Scott A: cell  
628 surface charge, hydrophobicity, and electron donor and acceptor characteristics under different  
629 environmental growth conditions. Appl Environ Microbiol. 1999;65(12):5328-5333. pmid:  
630 10583984.
- 631 27. Prajsnar TK, Renshaw SA, Ogryzko NV, Foster SJ, Serror P, Mesnage S. Zebrafish as a novel  
632 vertebrate model to dissect enterococcal pathogenesis. Infect Immun. 2013;81(11):4271-4279.  
633 doi: 10.1128/IAI.00976-13. pmid: 24002065.
- 634 28. Salamaga B, Prajsnar TK, Jareno-Martinez A, Willemse J, Bewley MA, Chau F, et al. Bacterial  
635 size matters: Multiple mechanisms controlling septum cleavage and diplococcus formation are  
636 critical for the virulence of the opportunistic pathogen *Enterococcus faecalis*. PLoS Pathog.  
637 2017;13(7):e1006526. doi: 10.1371/journal.ppat.1006526. pmid: 28742152.
- 638 29. Giaouris E, Briandet R, Meyrand M, Courtin P, Chapot-Chartier MP. Variations in the degree of  
639 D-Alanylation of teichoic acids in *Lactococcus lactis* alter resistance to cationic antimicrobials  
640 but have no effect on bacterial surface hydrophobicity and charge. Appl Environ Microbiol.  
641 2008;74(15):4764-4767. doi: 10.1128/AEM.00078-08. pmid: 18539809.
- 642 30. Dale JL, Nilson JL, Barnes AMT, Dunny GM. Restructuring of *Enterococcus faecalis* biofilm  
643 architecture in response to antibiotic-induced stress. NPJ Biofilms Microbiomes. 2017;3:15. doi:  
644 10.1038/s41522-017-0023-4. pmid: 28685097.
- 645 31. Teng F, Singh KV, Bourgoigne A, Zeng J, Murray BE. Further characterization of the epa gene  
646 cluster and Epa polysaccharides of *Enterococcus faecalis*. Infect Immun. 2009;77(9):3759-3767.  
647 doi: 10.1128/IAI.00149-09. pmid: 19581393.
- 648 32. Dunny GM, Brown BL, Clewell DB. Induced cell aggregation and mating in *Streptococcus*  
649 *faecalis*: evidence for a bacterial sex pheromone. Proc Natl Acad Sci U S A. 1978;75(7):3479-  
650 3483. pmid: 98769.
- 651 33. Talaga P, Vialle S, Moreau M. Development of a high-performance anion-exchange  
652 chromatography with pulsed-amperometric detection based quantification assay for  
653 pneumococcal polysaccharides and conjugates. Vaccine. 2002;20(19-20):2474-2484. pmid:  
654 12057602.

## EPA decoration is essential for virulence

- 655 34. Ames BN. Assay of inorganic phosphate, total phosphate and phosphatases. *Methods in*  
656 *Enzymology*. 1966;8:115-118. doi: [doi.org/10.1016/0076-6879\(66\)08014-5](https://doi.org/10.1016/0076-6879(66)08014-5).
- 657 35. Ho SN, Hunt HD, Horton RM, Pullen JK, Pease LR. Site-directed mutagenesis by overlap  
658 extension using the polymerase chain reaction. *Gene*. 1989;77(1):51-59. pmid: 2744487.
- 659 36. Maguin E, Duwat P, Hege T, Ehrlich D, Gruss A. New thermosensitive plasmid for gram-  
660 positive bacteria. *J Bacteriol*. 1992;174(17):5633-5638. pmid: 1324906.
- 661 37. Mesnage S, Chau F, Dubost L, Arthur M. Role of *N*-acetylglucosaminidase and *N*-  
662 acetylmuramidase activities in *Enterococcus faecalis* peptidoglycan metabolism. *J Biol Chem*.  
663 2008;283(28):19845-19853. doi: M802323200 [pii] 10.1074/jbc.M802323200. pmid: 18490448.
- 664 38. Nusseim-Volhard CDR. *Zebrafish. A practical approach*. New York, NY: Oxford University  
665 Press; 2002.

666

EPA decoration is essential for virulence

668 **Table 1. MIC of lysozyme for Firmicutes.**

| Strain                                                                                       | lysozyme MIC<br>(mg ml <sup>-1</sup> ) |     |
|----------------------------------------------------------------------------------------------|----------------------------------------|-----|
| <i>Staphylococcus aureus</i> COL                                                             | >16                                    | 669 |
| <i>Streptococcus gallolyticus</i> UCN34                                                      | >16                                    | 670 |
| <i>Streptococcus gordonii</i> DL-1 Challis                                                   | >16                                    | 671 |
| <i>Streptococcus mutans</i> UA159                                                            | >16                                    | 672 |
| <i>Enterococcus faecium</i> DO                                                               | >16                                    | 673 |
| <i>Enterococcus hirae</i> ATCC9790                                                           | >16                                    | 674 |
| <i>Enterococcus faecalis</i> OG1RF                                                           | >16                                    | 675 |
| <i>Enterococcus faecalis</i> O ( $\Delta$ oatA)                                              | >16                                    | 676 |
| <i>Enterococcus faecalis</i> OP ( $\Delta$ oatA $\Delta$ pgdA)                               | 16                                     | 677 |
| <i>Enterococcus faecalis</i> OPD ( $\Delta$ oatA $\Delta$ pgdA $\Delta$ dltA)                | 8                                      | 678 |
| <i>Enterococcus faecalis</i> OPDV ( $\Delta$ oatA $\Delta$ pgdA $\Delta$ dltA $\Delta$ sigV) | 0.5                                    | 679 |
| <i>Listeria monocytogenes</i> EGD                                                            | 4                                      | 680 |
| <i>Listeria monocytogenes</i> EGD $\Delta$ pgdA                                              | 0.125                                  | 681 |
| <i>Lactococcus lactis</i> MG1363                                                             | 0.125                                  | 682 |
| <i>Bacillus subtilis</i> 168                                                                 | 0.0312                                 | 683 |
| <i>Bacillus megaterium</i> KM                                                                | 0.0312                                 | 684 |
| <i>Lactobacillus cellobiosus</i> ATCC11739                                                   | 0.0312                                 | 685 |
| <i>Aerococcus viridans</i> ATCC11563                                                         | 0.0312                                 | 686 |
| <i>Micrococcus luteus</i> ATCC4698                                                           | 0.0005                                 | 687 |

688

689 **Table 2. Complementation of *epa* transposon mutants.**

690

| Mutant             | Complementation gene |             |             |             |
|--------------------|----------------------|-------------|-------------|-------------|
|                    | OG1RF_11720          | OG1RF_11715 | OG1RF_11714 | OG1RF_11707 |
| OPDV_11720::Tn2.9  | +                    | ND          | ND          | ND          |
| OPDV_11720::Tn2.5  | +                    | -           | -           | -           |
| OPDV_11715::Tn2.10 | ND                   | +           | ND          | ND          |
| OPDV_11715::Tn2.13 | -                    | +           | -           | -           |
| OPDV_11715::Tn2.16 | -                    | +           | -           | -           |
| OPDV_11714::Tn2.14 | -                    | -           | +           | -           |
| OPDV_11720::Tn2.12 | ND                   | ND          | ND          | +           |
| OPDV_11720::Tn2.8  | ND                   | ND          | -           | +           |
| OPDV_11720::Tn2.6  | ND                   | ND          | ND          | +           |

691 <sup>a</sup>, Complementation was assessed on BHI-agar plates containing lysozyme at a concentration  
692 of 0.5 mg ml<sup>-1</sup>

693 +, complementation restoring lysozyme sensitivity; -, no impact on lysozyme MIC;

694 ND, not determined.

695

696

697 **Figure legends**

698

699 **Figure 1. Identification of *epa* mutants resistant to lysozyme. A.** Description of individual  
700 transposon insertions. **B.** Mapping of transposon insertions in the *epa* variable region.  
701 Insertion sites are indicated by vertical arrows. ORFs in the *epa* variable region are depicted  
702 in grey. <sup>2</sup>

703 **Figure 2. Growth defect of *E. faecalis* Tn mutants in the presence of antimicrobials**  
704 **targeting the cell envelope.** Cell suspensions were prepared as described in S1 Fig and  
705 1.5  $\mu$ l of serial dilutions were spotted on BHI-agar plates containing 10 ng ml<sup>-1</sup>  
706 anhydrotetracycline and various concentrations of lysozyme. Concentrations showing a clear  
707 difference in susceptibility are shown.

708 **Figure 3. Analysis of purified EPA polysaccharides and their contribution to cell**  
709 **surface charge. A.** Analysis of purified EPA by acrylamide gel electrophoresis. 40  $\mu$ g of  
710 material was loaded on a 10 % (v/v) acrylamide-bisacrylamide (33:0.8) gel and stained with  
711 the cationic dye alcian blue. **B.** Electrophoretic mobility of *E. faecalis* OG1RF, *OPDV* and  
712 insertion mutants resistant to lysozyme. Representative mutants harbouring a transposon  
713 insertion in *OG1RF\_11720* (*OPDV\_11720::Tn2.5*), *OG1RF\_11715* (*OPDV\_11715::Tn2.13*),  
714 *OG1RF\_11714* (*OPDV\_11714::Tn2.14*) or *OG1RF\_11707* (*OPDV\_11707::Tn2.8*) were  
715 analysed. Wild-type OG1RF and parental *OPDV* strains were included as controls. **C.**  
716 Phosphate content of purified EPAs. 120  $\mu$ l of each purified polysaccharide at a  
717 concentration of 1 mg ml<sup>-1</sup> was assayed as described previously [34]. **D.** Carbohydrate  
718 composition of purified EPA polysaccharides. The relative percentage corresponding to each  
719 monosaccharide was determined from three independent extractions.

720 **Figure 4. Structural analysis of purified EPA polysaccharides. A.** 1D proton spectra of  
721 the EPA polysaccharides extracted from strains *OPDV*, *OPDV\_11720::Tn2.5*,  
722 *OPDV\_11715::Tn2.13*, *OPDV\_11714::Tn2.14* or *OPDV\_11707::Tn2.8*. The grey boxes  
723 indicate anomeric (4.5-5.5 ppm) and methyl protons (1.2-2.5 ppm). **B.** 2D <sup>1</sup>H-<sup>13</sup>C HSQC  
724 spectra of EPA polysaccharides. The region corresponding to anomeric protons (4.2-5.5 ppm)  
725 and anomeric carbons (90-105 ppm) is shown. *OPDV* signals are in black, mutant signals in  
726 red. Boxes show signals with a lower intensity or a shift in the mutant EPA samples. Close-  
727 up views of the boxed regions are shown in S4 Fig.

EPA decoration is essential for virulence

728 **Figure 5. Growth defect of *E. faecalis* OG1RF in frame *epa* mutants in the presence of**  
729 **antimicrobials targeting the cell envelope.** Cell suspensions were prepared as described in  
730 S1 Fig and 1.5  $\mu$ l of serial dilutions were spotted on BHI-agar plates containing 10 ng ml<sup>-1</sup>  
731 anhydrotetracycline and SDS, sodium cholate, polymyxin B or nisin. For each antimicrobial,  
732 one concentration showing a difference in susceptibility is shown.

733 **Figure 6. Virulence of *epa* mutants and complemented strains in the zebrafish model of**  
734 **infection.** Survival of zebrafish larvae (n>20) following infection with *E. faecalis* OG1RF  
735 (WT) and *epa* deletion mutants was monitored over 90 h post infection. **A.** Mutant  $\Delta I1720$ .  
736 **B.** Mutant  $\Delta I1715$ . **C.** Mutant  $\Delta I1714$ . **(D),** Mutant  $\Delta I1707$ . **E.** Statistical significance  
737 determined by Log-rank test; ns,  $P>0.05$ ; \*\* $P<0.01$ ; \*\*\*  $P<0.001$ ; \*\*\*\*  $P<0.0001$ . All  
738 injections presented in Fig 4A and 4D were carried out on the same day. The same data  
739 corresponding to the OG1RF strain are therefore shown for the 2 experiments.

740 **Fig 7 *epaX* mutant cells are more prone to phagocytosis than wild-type and**  
741 **complemented cells. A.** Quantification of *E. faecalis* uptake by zebrafish phagocytes.  
742 Embryos were infected with 1,600 CFUs of *E. faecalis* cells constitutively producing  
743 mCherry and fixed in 4 % paraformaldehyde 1.5 h post infection. Phagocytes were  
744 immunolabelled using rabbit anti L-plastin antibodies and detected with goat anti-rabbit  
745 antibodies conjugated to Alexafluor 488. The infected and immunolabelled embryos were  
746 imaged using scanning confocal microscope. The ratio of mCherry fluorescence signal area  
747 associated with phagocytosed and free bacteria was measured using the Fish Analysis Fiji  
748 plugin. The uptake of mutant OG1RF  $\Delta I1714$  ( $\Delta epaX$ ) was significantly higher when  
749 compared to the wild-type (OG1RF; \*\*\* $P = 0.0006$ ) and complemented strain (OG1RF  
750  $\Delta I1714 + pTetH-OG1RF_{11714}$ ; \*\* $P = 0.0049$ ). No difference in phagocytosis was  
751 observed between the wild-type and complemented strains (ns,  $P>0.05$ ). Representative  
752 images showing *E. faecalis* uptake in zebrafish embryos are shown. Each picture corresponds  
753 to the quantification result indicated with a red dot in **A**, following infection with OG1RF  
754 **(B)**, OG1RF  $\Delta I1714$  ( $\Delta epaX$ ) **(C)** and the complemented strain **(D)**. Phagocytes labeled with  
755 L-plastin appear in green, mCherry labelled bacteria in red. Scale bar is 25  $\mu$ m.

756

757

758



759 **Supporting information Legend**

760 **S1 Figure. Lysozyme MICs for Firmicutes.** A cell suspension in phosphate saline buffer  
761 was adjusted to an OD at 600 nm of 1 and 1.5  $\mu$ l of serial dilutions were spotted on BHI-agar  
762 plates containing various concentrations of lysozyme. ND, undiluted cell suspension;  $10^{-1}$ ,  
763 10-fold dilution;  $10^{-2}$ , 100-fold dilution;  $10^{-3}$ , 1000-fold dilution;  $10^{-4}$ , 10000-fold dilution;  
764  $10^{-5}$ , 100000-fold dilution.

765 **S2 Figure. Western blot analysis of complementation strains.** Cultures were grown in BHI  
766 to an OD at 600 nm of 0.5 and expression of the *epa* genes was induced by addition of  
767 anhydrotetracycline ( $10 \text{ ng ml}^{-1}$ ). After 2 h, cells were harvested and mechanically broken in  
768 the presence of glass beads. Crude extracts ( $20 \mu\text{g}$ ) were loaded on SDS-PAGE, transferred  
769 onto a nitrocellulose membrane and probed with a polyclonal serum against the polyhistidine  
770 tag. Bands of the expected molecular weights were detected (OG1RF\_11707, 36.7 kDa;  
771 OG1RF\_11714, 38.9 kDa; OG1RF\_11715, 38.4 kDa; OG1RF\_11720, 30.8 kDa).

772 **S3 Figure. HPLC analysis of TFA-hydrolysed EPA polysaccharides.** Following gel  
773 filtration, fractions containing neutral sugars were pooled and freeze-dried. EPA was  
774 hydrolysed in the presence of 4 N TFA at  $100^{\circ}\text{C}$  for 4 h. Monosaccharides were separated on  
775 a carbopac PA10 column by high performance anion exchange chromatography coupled to  
776 pulsed-amperometric detection. Representative chromatograms are shown for  
777 monosaccharide standards and each transposon mutant. EPA polysaccharides were extracted  
778 from three independent cultures to give average values in Fig 3D.

779 **S4 Figure.  $^1\text{H}$ - $^{13}\text{C}$  HSQC spectra showing signals altered in *epa* mutants. A.** Region  
780 corresponding to anomeric protons (4.2-5.5 ppm) and anomeric carbons (90-105 ppm)  
781 highlighting four regions of the spectra (boxed) with signals shifted or changing in intensity  
782 in the *epa* mutants. **B.** Boxed regions in A. are shown for individual mutant and one  
783 complemented strain.

784 **S5 Figure. PCR analysis of OG1RF derivatives harbouring in-frame deletions in**  
785 ***OG1RF\_11720*, *OG1RF\_11715*, *OG1RF\_11714* and *OG1RF\_11707*.**

786 **S6 Figure. Virulence of *epa* transposon mutants and complemented strains in the**  
787 **zebrafish model of infection.** Survival of zebrafish larvae ( $n > 20$ ) following infection with *E.*  
788 *faecalis* OG1RF (WT) and *epa* insertion mutant was monitored over 90h post infection.  
789 **A.** Mutant *OPDV\_11720::Tn2.5*. **B.** Mutant *OPDV\_11715::Tn2.13*. **C.** Mutant

EPA decoration is essential for virulence

790 *OPDV\_11714::Tn2.14*. **D.** Mutant *OPDV\_11707::Tn2.8*. Statistical significance was  
791 determined by Log-rank test; NS,  $P>0.05$ ; \*\* $P<0.01$ ; \*\*\*  $P<0.001$ ; \*\*\*\*  $P<0.0001$ . The  
792 same data corresponding to the WT strain are shown in Fig4A/4C and Fig 4B/4D.

793 **S7 Figure. Comparative analysis of OG1RF and *OPDV* virulence in the zebrafish model**  
794 **of infection.** Survival of zebrafish larvae (n=28) following infection with 1,000 CFUs of *E.*  
795 *faecalis* OG1RF (WT) and *OPDV* mutant was monitored over 90 h post infection. The lack of  
796 statistical significance ( $P=0.645$ ) was determined by Log-rank test.

797 **S8 Figure. Growth rate analysis of *E. faecalis* OG1RF and *epa* derivatives.** Cells from  
798 overnight cultures in BHI were diluted to an OD at 600 nm of 0.01 in 25 ml BHI and growth  
799 of standing cultures was monitored over 6 h. The data presented are the average of 3  
800 independent cultures. The same OG1RF growth curves were used as a control in each graph.

801 **S9 Figure. Step-by-step description of the transposon mapping strategy.** **A.** Schematic  
802 representation of the *mariner* transposon used. It consists of a gentamycin resistance cassette  
803 flanked by two inverted repeats. **B.** Step 1: digestion of chromosomal DNA with SspI, which  
804 has a unique cleavage site in the gentamycin resistance cassette. **C.** step 2: self-ligation of  
805 SspI digestion products. **D.** step 3: reverse PCR on ligation products with two divergent  
806 oligonucleotides (Mar\_dn and Mar\_up). **E.** step 4: sequencing of the PCR product using  
807 oligonucleotide T7.

808  
809 **S1 Table. Electrophoretic mobility measurements.** The values presented are the average of  
810 three independent biological replicates  $\pm$  standard deviation.

811  
812 **S2 Table. Statistical significance of pairwise comparisons of electrophoretic mobility.**  
813 The significance values have been calculated using two-way ANOVA.

814  
815 **S3 Table. Statistical significance of pairwise comparisons of phosphate assays.** The  
816 significance values have been calculated using unpaired t-test.

817  
818 **S4 Table. Bacterial strains, plasmids and oligonucleotides used in this study.**

**A**

| Disrupted gene <sup>a</sup>                       | Insertion site    | Mutant                    | Gene                     | Putative function     |
|---------------------------------------------------|-------------------|---------------------------|--------------------------|-----------------------|
| <i>OG1RF_11720</i> ( <i>EF2176</i> )              | nt 392 of 759     | <i>OPDV_11720::Tn2.9</i>  | <i>cpsH</i> <sup>b</sup> | Glycosyl transferase  |
| <i>OG1RF_11720</i> ( <i>EF2176</i> )              | nt 619 of 759     | <i>OPDV_11720::Tn2.5</i>  | <i>cpsH</i>              | Glycosyl transferase  |
| <i>OG1RF_11715</i> ( <i>EF2170</i> ) <sup>c</sup> | nt 43 of 978      | <i>OPDV_11715::Tn2.10</i> | <i>epaOX</i>             | Glycosyl transferase  |
| <i>OG1RF_11715</i> ( <i>EF2170</i> )              | nt 553 of 978     | <i>OPDV_11715::Tn2.13</i> | <i>epaOX</i>             | Glycosyl transferase  |
| <i>OG1RF_11715</i> ( <i>EF2170</i> )              | nt 925 of 978     | <i>OPDV_11715::Tn2.16</i> | <i>epaOX</i>             | Glycosyl transferase  |
| <i>OG1RF_11714</i> ( <i>EF2170</i> ) <sup>d</sup> | nt 478 of 981     | <i>OPDV_11714::Tn2.14</i> | <i>epaX-like</i>         | Glycosyl transferase  |
| <i>OG1RF_11707</i> ( <i>EF2165</i> )              | 50nt upstream ATG | <i>OPDV_11707::Tn2.12</i> | <i>rfbB</i> <sup>e</sup> | Epimerase/dehydratase |
| <i>OG1RF_11707</i> ( <i>EF2165</i> )              | 24nt upstream ATG | <i>OPDV_11707::Tn2.8</i>  | <i>rfbB</i>              | Epimerase/dehydratase |
| <i>OG1RF_11707</i> ( <i>EF2165</i> )              | nt 828 of 951     | <i>OPDV_11707::Tn2.6</i>  | <i>rfbB</i>              | Epimerase/dehydratase |

<sup>a</sup> The closest homolog in *E. faecalis* V583 is indicated in brackets

<sup>b</sup> *OG1RF\_11720* is 99.7 % identical to *Streptococcus pneumoniae cpsH*

<sup>c</sup> *OG1RF\_11715* shares 28 % identity and 45 % similarity with *EF2170*

<sup>d</sup> *OG1RF\_11714* shares 53 % identity and 61 % similarity with *EF2170*

<sup>e</sup> *OG1RF\_11707* is 100 % identical to *S. pneumoniae rfbB*

**B**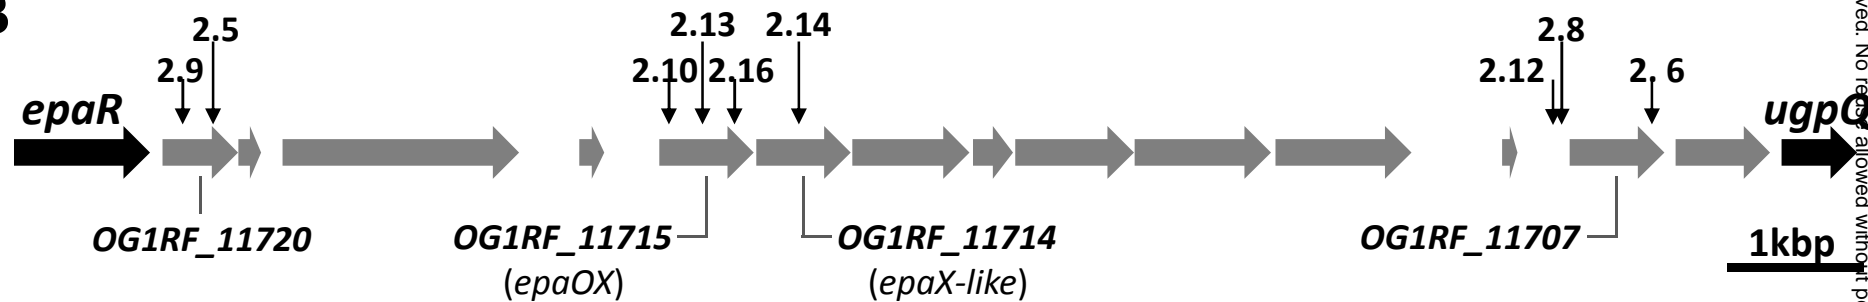**Figure 1**

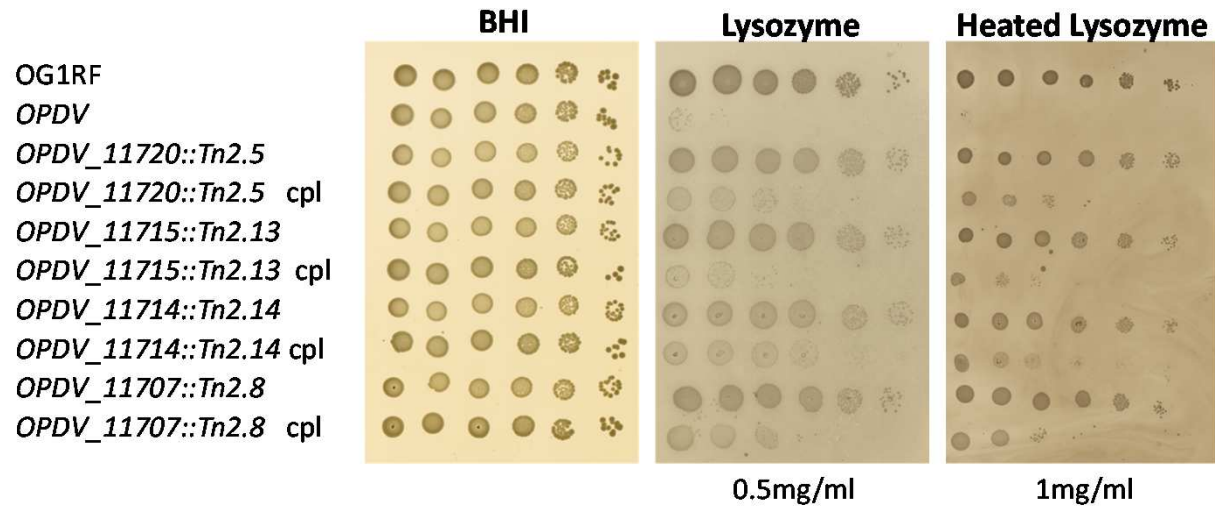

Figure 2

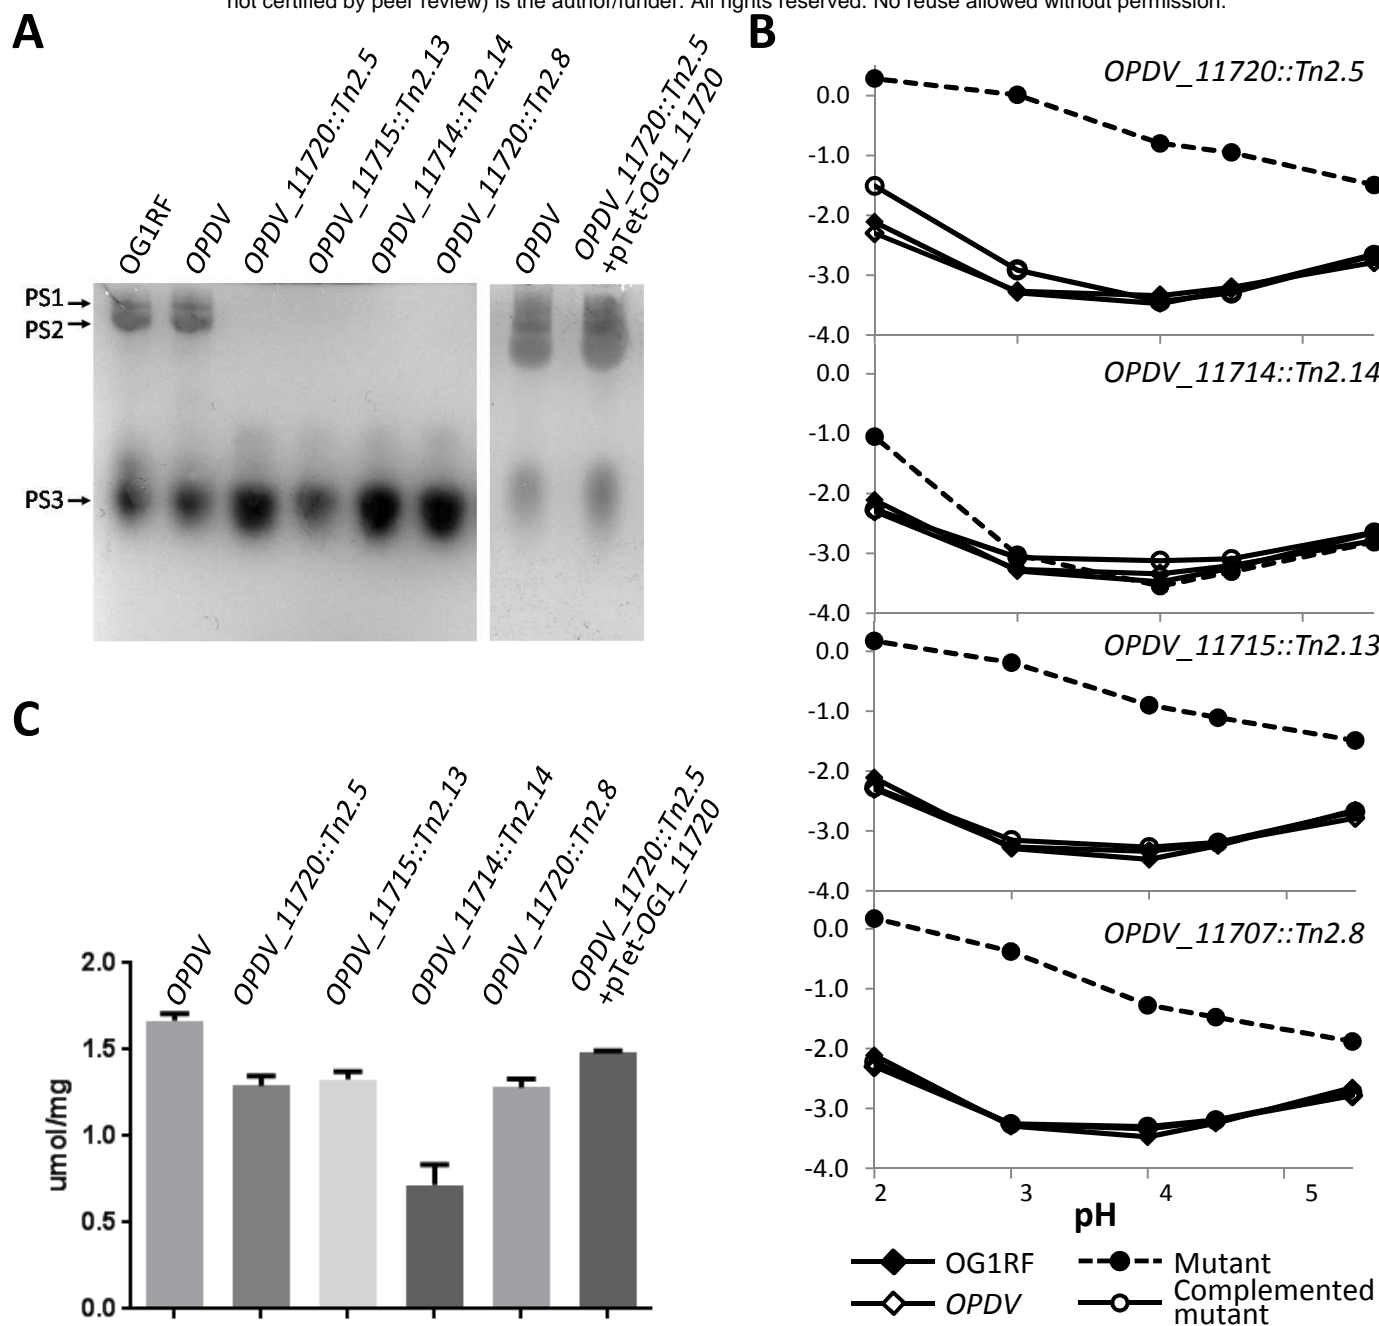

**Figure 3**

**A**

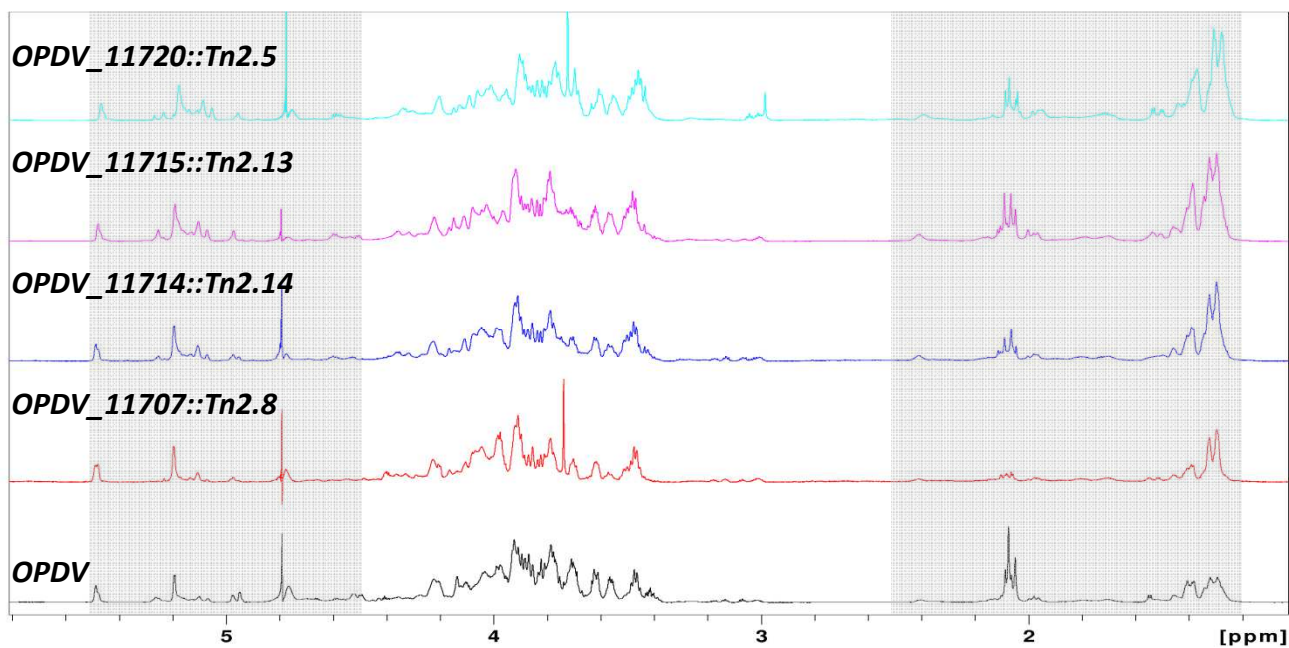

**B**

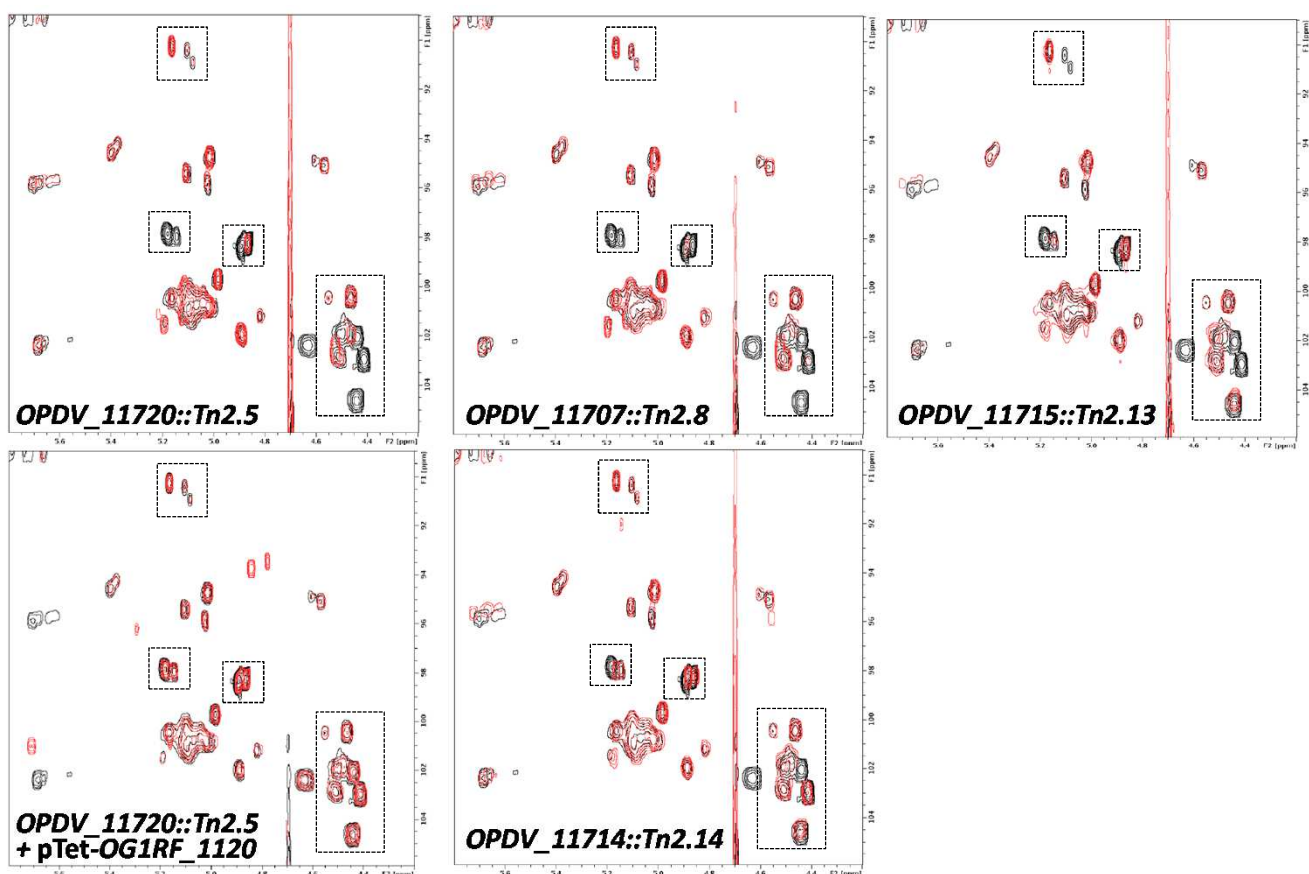

**Figure 4**

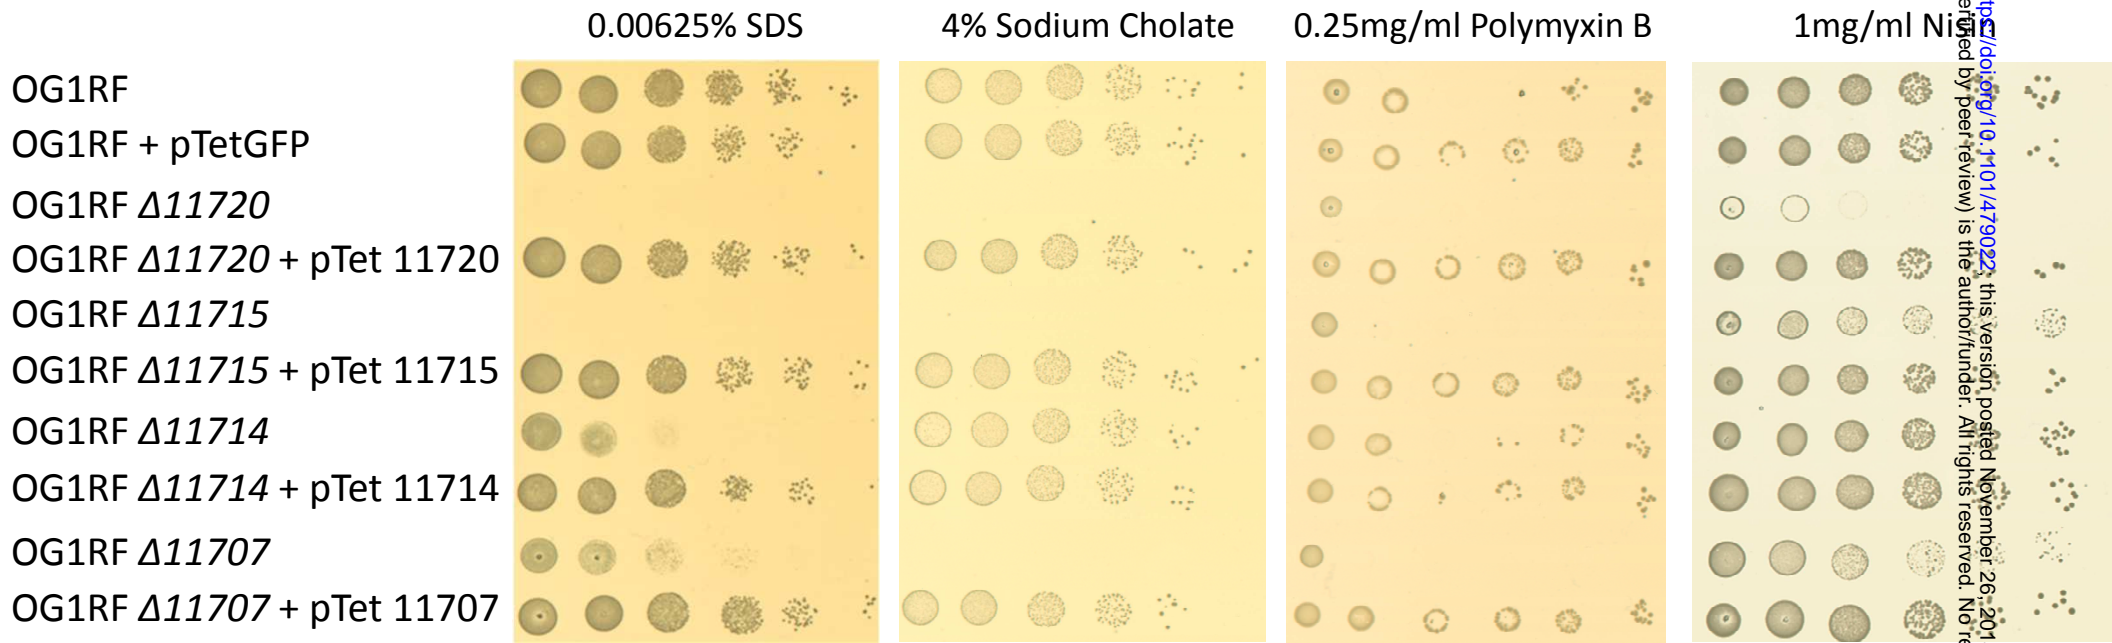

Figure 5

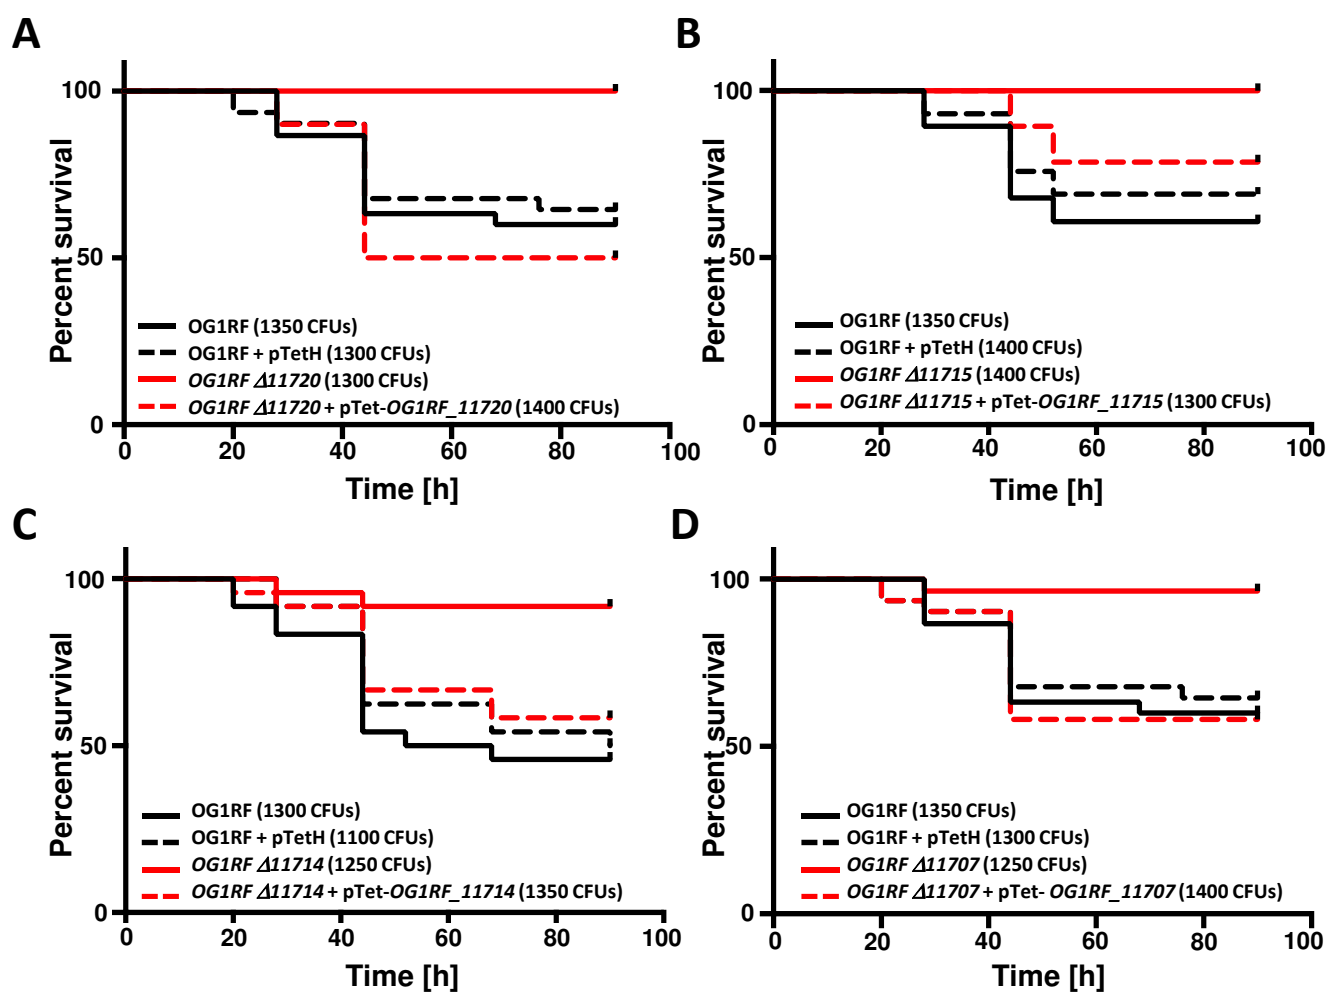

|                                                                 | Significance | P value |
|-----------------------------------------------------------------|--------------|---------|
| OG1RF vs OG1RF + pTetH                                          | ns           | 0.7158  |
| OG1RF vs OG1RF $\Delta$ 11720                                   | ****         | <0.0001 |
| OG1RF + pTetH vs OG1RF $\Delta$ 11720 + pTet-OG1RF_11720        | ns           | 0.3095  |
| OG1RF $\Delta$ 11720 vs OG1RF $\Delta$ 11720 + pTet-OG1RF_11720 | ****         | <0.0001 |
| OG1RF vs OG1RF + pTetH                                          | ns           | 0.4985  |
| OG1RF vs OG1RF $\Delta$ 11715                                   | ***          | 0.0001  |
| OG1RF + pTetH vs OG1RF $\Delta$ 11715 + pTet-OG1RF_11715        | ns           | 0.3501  |
| OG1RF $\Delta$ 11715 vs OG1RF $\Delta$ 11715 + pTet-OG1RF_11715 | **           | 0.0079  |
| OG1RF vs OG1RF + pTetH                                          | ns           | 0.6021  |
| OG1RF vs OG1RF $\Delta$ 11714                                   | ***          | 0.0008  |
| OG1RF + pTetH vs OG1RF $\Delta$ 11714 + pTet-OG1RF_11714        | ns           | 0.6186  |
| OG1RF $\Delta$ 11714 vs OG1RF $\Delta$ 11714 + pTet-OG1RF_11714 | **           | 0.0099  |
| OG1RF vs OG1RF + pTetH                                          | ns           | 0.7158  |
| OG1RF vs OG1RF $\Delta$ 11707                                   | **           | 0.0012  |
| OG1RF + pTetH vs OG1RF $\Delta$ 11707 + pTet-OG1RF_11707        | ns           | 0.6321  |
| OG1RF $\Delta$ 11707 vs OG1RF $\Delta$ 11707 + pTet-OG1RF_11707 | ***          | 0.0008  |



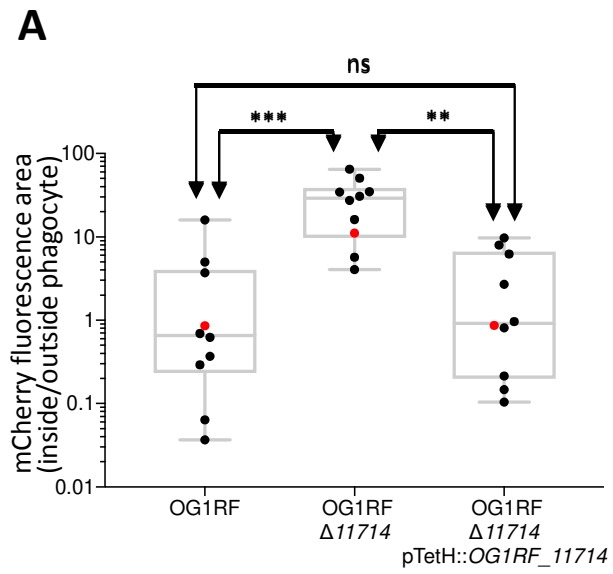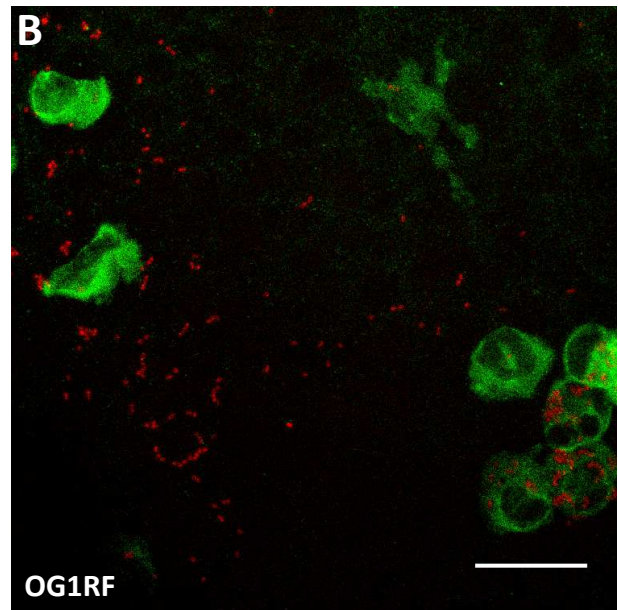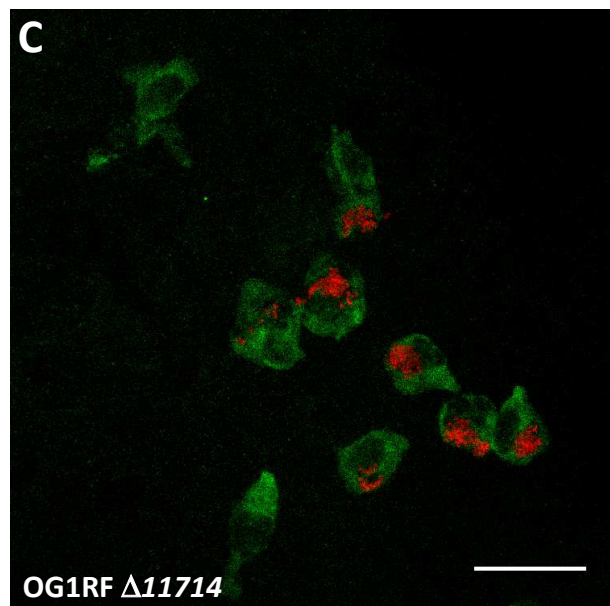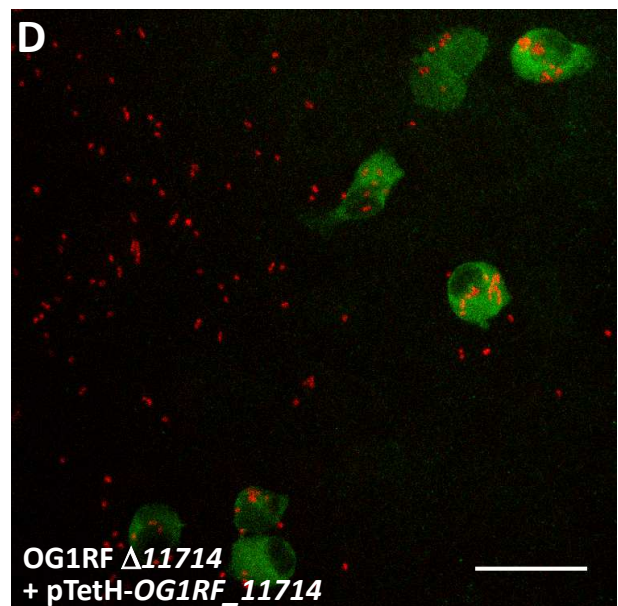

Source: http://biorxiv.org/content/10.1101/479022v1.full.pdf
