## EPA decoration is essential for virulence

### 31 **Abstract**

32 *Enterococcus faecalis* is an opportunistic pathogen with an intrinsically high resistance to  
33 lysozyme, a key effector of the innate immune system. This high level of resistance requires  
34 several genes (*oatA*, *pgdA*, *dltA* and *sigV*) acting synergistically to inhibit both the enzymatic  
35 and cationic antimicrobial peptide activities of lysozyme. We sought to identify novel genes  
36 modulating *E. faecalis* resistance to lysozyme. Random transposon mutagenesis carried out in  
37 the quadruple *oatA/pgdA/dltA/sigV* mutant led to the identification of several independent  
38 insertions clustered on the chromosome. These mutations were located in a locus referred to as  
39 the enterococcal polysaccharide antigen (EPA) variable region located downstream of the  
40 highly conserved *epaA-epaR* genes proposed to encode a core synthetic machinery. The *epa*  
41 variable region was previously proposed to be responsible for EPA decorations, but the role of  
42 this locus remains largely unknown. Here, we show that EPA decoration contributes to  
43 resistance towards charged antimicrobials and underpins virulence in the zebrafish model of  
44 infection by conferring resistance to phagocytosis. Collectively, our results indicate that the  
45 production of the EPA rhamnopolysaccharide backbone is not sufficient to promote *E. faecalis*  
46 infections and reveal an essential role of the modification of this surface polymer for  
47 enterococcal pathogenesis.

48

49 **Introduction**

50

51 *Enterococcus faecalis* is a commensal bacterium found in the gastro-intestinal tract of  
52 humans and frequently isolated from the environment as a result of faecal contamination [1,  
53 2]. Although this organism is considered as harmless in healthy carriers, *E. faecalis* has been  
54 proposed to contribute to the pathogenesis of inflammatory bowel disease and colorectal  
55 cancer [3, 4]. *E. faecalis* can also cause a wide range of hospital-acquired opportunistic  
56 infections that can be life-threatening [1]. *E. faecalis* infections can be difficult to treat due to  
57 the resistance of this organism to antibiotics such as cephalosporins and glycopeptides  
58 (Vancomycin Resistant Enterococci, VRE) and its capacity to form biofilms [5].  
59 Interestingly, *E. faecalis* strains responsible for hospital-acquired infections are also found in  
60 healthy individuals and genes associated with virulence are not only present in clinical  
61 isolates [6]. How this organism can cause infections is therefore not entirely understood. One  
62 property of *E. faecalis* that contributes to the onset of infections is its resistance to the host  
63 innate immune system. Cell surface polymers including teichoic acids (TAs), a capsule and  
64 the enterococcal polysaccharide antigen (EPA) confer phagocytosis evasion and resistance to  
65 complement activation [7-9]. *E. faecalis* also displays an intrinsically high resistance to  
66 lysozyme, a key component of the innate immune system representing a first line of defence  
67 against pathogens. Lysozyme is found in virtually all human biological fluids including  
68 saliva, milk, serum and tears where it is found at concentrations between 1-2 mg ml<sup>-1</sup> [10,  
69 11]. Lysozyme has two distinct antimicrobial activities. Firstly, it hydrolyses the glycan  
70 chains of peptidoglycan, the major component of the bacterial cell wall, causing cell lysis  
71 [12]. Secondly, lysozyme displays cationic antimicrobial peptide (CAMP) activity. Lysozyme  
72 contains highly charged C-terminal sequences (RAWVAWRNR in human lysozyme)  
73 sufficient to inhibit bacterial growth [13] by causing membrane permeabilization [14].  
74 Four genes (*oatA*, *pgdA*, *dltA* and *sigV*) contribute synergistically to lysozyme resistance in *E.*  
75 *faecalis*. Both OatA and PgdA modify peptidoglycan glycan strands, thereby inhibiting  
76 lysozyme catalytic activity. OatA is an *O*-acetyl transferase that transfers an acetyl group  
77 onto the C6-OH group of *N*-acetylmuramic acid residues [15]. PgdA is produced in response  
78 to lysozyme and is an esterase that removes the acetyl group in position 2 of *N*-  
79 acetylglucosamine residues [16]. DltA is a D-alanine-D-alanyl carrier ligase essential for the  
80 alanylation of TAs. It has been proposed that this modification reduces the net negative  
81 charge of TAs and inhibits the CAMP activity of lysozyme [17]. SigV is an extracytoplasmic  
82 sigma factor that controls the expression level of *pgdA* in response to lysozyme [18, 19].

## EPA decoration is essential for virulence

83 *oatA*, *pgdA*, *dltA* and *sigV* act in concert to confer high-level resistance to lysozyme in *E.*  
84 *faecalis*. Deletions in these genes (alone or in combination) have been associated with a  
85 reduction in virulence in mice or *Galleria mellonella* [18, 19] and a decrease in survival  
86 within murine peritoneal macrophages [15].

87 In this study, we show that the quadruple mutant (*oatA*, *pgdA*, *dltA* and *sigV*; *OPDV* strain)  
88 still displays a relatively high resistance to lysozyme in comparison to other Firmicutes.  
89 Using transposon mutagenesis, we used this quadruple mutant to carry out transposon  
90 mutagenesis and to identify additional genes involved in lysozyme resistance. We show that  
91 several genes contributing to the decoration of the enterococcal polysaccharide antigen play  
92 an essential role in the resistance to effectors of the innate immune system and in virulence.

EPA decoration is essential for virulence

93 **Results**

94

95 **The *E. faecalis* quadruple mutant harboring deletions in *oatA*, *pgdA*, *dltA* and *sigV***  
96 **displays a relatively high residual resistance to lysozyme.**

97 We determined the minimal inhibitory concentrations (MIC) of lysozyme for several Gram-  
98 positive bacteria (Table 1; see S1 Fig for a representative set of MIC assays). *Micrococcus*  
99 *luteus*, used as a reference substrate to define lysozyme activity [20] had an expected very  
100 low MIC of  $5 \times 10^{-4}$  mg ml<sup>-1</sup>. MIC values were higher for all Firmicutes tested. Growth of  
101 several species was inhibited by lysozyme concentrations of 0.0312 mg ml<sup>-1</sup> (*Aerococcus*  
102 *viridans* *Bacillus subtilis*, *Bacillus megaterium* and *Lactobacillus cellobiosus*). *Lactococcus*  
103 *lactis* growth was inhibited by concentrations of 0.125 mg ml<sup>-1</sup>. The MIC of lysozyme for all  
104 pathogens tested was relatively high: 4 mg ml<sup>-1</sup> for *Listeria monocytogenes* and >16 mg ml<sup>-1</sup>  
105 for *Staphylococcus aureus*, and all enterococci and streptococci tested. In *L. monocytogenes*,  
106 lysozyme resistance was largely due to peptidoglycan de-*N*-acetylation. Deletion of the gene  
107 encoding the deacetylase PgdA led to a 32-fold decrease in resistance (MIC=0.125 mg ml<sup>-1</sup>).  
108 Interestingly, abolishing peptidoglycan *O*-acetylation or de-*N*-acetylation in *E. faecalis* only  
109 had a minor impact on lysozyme resistance [16, 19]. The combined deletions in the four  
110 genes contributing to *E. faecalis* lysozyme resistance (*oatA*, *pgdA*, *dltA* and *sigV*; *OPDV*  
111 strain) was required for 10-fold reduction in the MIC of this antimicrobial compound  
112 (0.5 mg ml<sup>-1</sup>). However, the lysozyme MIC for the *OPDV* mutant was still higher than that of  
113 non-pathogenic Gram-positive bacteria.

114

115 **Transposon mutagenesis of the *OPDV epa* variable region confers resistance to**  
116 **lysozyme.**

117 The relatively high lysozyme MIC of the quadruple mutant (*OPDV* strain) prompted us to  
118 further explore *E. faecalis* properties modulating lysozyme activity. We constructed a  
119 transposon mutant library in the *OPDV* background using the *Mariner*-based system  
120 previously described for *E. faecium* [21]. Transposon mutants were selected on agar plates  
121 containing lysozyme at a concentration of 2 mg ml<sup>-1</sup>, four times the MIC for the parental  
122 *OPDV* strain. Approximately  $2 \times 10^5$  mutants were plated and after 24 h incubation at 37°C,  
123 16 mutants forming colonies at this concentration were isolated and further analysed.

124 Mapping the transposon insertion sites revealed that 9 mutants had insertions downstream of  
125 the conserved *epaA-epaR* region encoding the core synthetic apparatus likely required to  
126 produce the enterococcal polysaccharide antigen EPA (Fig 1A) [22]. The region containing

## EPA decoration is essential for virulence

127 the insertions displays genetic variability between strains and was proposed to be responsible  
128 for the decoration of the EPA polysaccharide [22-24]. Mutations were clustered around three  
129 genes encoding putative glycosyltransferases and a homolog of *wcaG*, an  
130 epimerase/dehydratase (Fig 1B).

131 Transposon mutants were complemented to formally establish that the insertions in the *epa*  
132 variable region were responsible for lysozyme resistance. Four plasmids were constructed to  
133 express *OG1RF\_11720*, *OG1RF\_11715* (*epaOX*), *OG1RF\_11714* (*epaX-like*) and  
134 *OG1RF\_11707* under the control of the inducible *tet* promoter. Following transformation into  
135 *E. faecalis*, gene expression was induced in the presence of anhydrotetracycline (ATc) and  
136 the production of his-tagged proteins was checked by western blot (S2 Fig).  
137 Complementation was evaluated by measuring susceptibility to lysozyme (Fig 2). Lysozyme  
138 resistance associated with transposon insertions in genes *OG1RF\_11720*, *OG1RF\_11715*,  
139 *OG1RF\_11714* and *OG1RF\_11707* could be complemented when the disrupted gene was  
140 expressed *in trans*. By contrast, the parental susceptibility to lysozyme could not be restored  
141 when complementation experiments were carried out with plasmids encoding a gene distinct  
142 from the one disrupted (Table 2). Altogether, these experiments confirmed that the resistance  
143 phenotypes of the mutants analysed were due to the disruption of the genes indicated in Fig 1.

144

145

### 146 **Mutations in the *epa* variable region alter the negative surface charge of *E. faecalis* and** 147 **are associated with minor changes in sugar composition.**

148 The impact of *epa* transposon insertions on the production of EPA was investigated.  
149 Polysaccharides were extracted from cultures at the end of exponential growth as previously  
150 described [25]. Similar amounts of EPA were extracted as assessed by neutral sugar assays  
151 and dry weight (between 20 and 30 mg l<sup>-1</sup>). Each purified EPA sample was run on a  
152 polyacrylamide gel and stained with the cationic dye alcian blue (Fig 3A). Whilst *OG1RF*  
153 and *OPDV* polysaccharide bands previously named PS1 and PS2 were present [8], these were  
154 not detected in mutant samples, possibly because the reduced negative charge no longer  
155 allowed EPA to migrate in the gel or no longer allowed these polymers to be stained by  
156 alcian blue. As expected, complementation restored the detection of EPA after staining by  
157 alcian blue (Fig 3A).

158 We tested the impact of the transposon insertions on EPA charge by measuring the  
159 electrophoretic mobility of *E. faecalis* cells using micro-electrophoresis, which allows single  
160 particle tracking (Fig 3B) [26]. *OG1RF* cells displayed a negative electrophoretic mobility

## EPA decoration is essential for virulence

161 (migration towards the anode), even at low pH, indicating a negative surface charge. Despite  
162 the increased susceptibility of *OPDV* cells to lysozyme, the electrophoretic mobility  
163 measured with this strain was not significantly different from the mobility of OG1RF cells at  
164 all pHs tested (Fig 3B; S1 and S2 Table). Three of the four insertion mutants  
165 (*OPDV\_11720::Tn2.5*, *OPDV\_11715::Tn2.13* and *OPDV\_11720::Tn2.8*) displayed similar  
166 electrophoretic mobilities, very distinct from the parental *OPDV* strain. The negative surface  
167 charge of these mutants was significantly reduced as compared to that of the parental *OPDV*  
168 strain (\*\*\*\* $P < 0.0001$  for all pH conditions), the difference being most prominent at pH 3.0  
169 (Fig 3B). As expected, differences between *OPDV*, *OPDV\_11720::Tn2.5*,  
170 *OPDV\_11715::Tn2.13* and *OPDV\_11720::Tn2.8* cells were abolished when the mutations  
171 were complemented. Mutant *OPDV\_11714::Tn2.14* only showed a difference with the  
172 parental *OPDV* strain at pH 2.0 (\*\*\*\* $P < 0.0001$ ). This difference was no longer detected  
173 when the mutation was complemented.

174 To confirm that the lack of detection of EPA on polyacrylamide gels was due to a loss of  
175 negatively charged groups rather than a lack of rhamnopolysaccharide production, we carried  
176 out carbohydrate composition analyses on purified EPA (Fig. 3C). As anticipated, EPA  
177 composition was very similar in OG1RF and *OPDV* strains; rhamnose, glucose, *N*-  
178 acetylglucosamine (GlcNac) and *N*-acetylgalactosamine (GalNac) accounted for  
179 approximately 95% of the sugars identified (*ca.* 30%, 30%, 20% and 15%, respectively) and  
180 galactose was found in limited amounts (5%). The proportion of glucose and GlcNac  
181 remained similar to parental *OPDV* levels in all *epa* mutants, whilst both GalNac and  
182 galactose amounts decreased to an increase of rhamnose. Interestingly, these changes were  
183 different depending on the mutant considered. For example, EPA extracted from  
184 *OPDV\_11718::Tn2.8* was the only mutant EPA that still contained some galactose. The  
185 relative proportion of rhamnose increased in all mutants. GalNac content decreased  
186 dramatically in all mutant EPA and could not be detected in *OPDV\_11715::Tn2.13*.

187

### 188 **NMR analyses reveal that the *epa* variable region contributes to minor modifications of** 189 **the EPA polysaccharide.**

190 To gain further insight into the contribution of *epa* variable genes to the structure of EPA, we  
191 carried out NMR analyses on purified polysaccharides. The 1D proton NMR spectra of all  
192 polysaccharides were overall similar but mutations in the *epa* variable region were associated  
193 with modifications in the anomeric region (Fig 4A). Clear differences were also detected in  
194 the relative intensities of methyl protons in the mutant spectra. For all mutants, the intensity

## EPA decoration is essential for virulence

195 of *N*-acetyl signals (1.9-2.2 ppm) decreased whilst the intensity of methyl protons  
196 corresponding to rhamnose residues (1.2-1.6 ppm) increased, suggesting a lower content of  
197 hexosamine in mutant EPAs and a relative increase of rhamnose. This result is in agreement  
198 with the carbohydrate analyses following acid hydrolysis (Fig 3C and S3 Fig).  $^1\text{H}$ - $^{13}\text{C}$  HSQC  
199 spectra revealed that EPA has a very complex structure, as evidenced by the detection of over  
200 30 signals in the anomeric region (Fig 4B). The comparison of 2D spectra corresponding to  
201 *OPDV* and mutant polysaccharides revealed that each *epa* mutation only led to a limited  
202 number of changes including changes in the signal intensity, signal shifts and disappearance  
203 (S4 Fig). The number and the nature of the signals affected in the *epa* mutants were different  
204 depending on the mutation considered. Altogether, NMR and sugar analyses supported the  
205 idea that the *epa* variable genes are involved in limited modifications of the EPA  
206 rhamnopolysaccharide previously described as “decorations”.

207

### **Epa decoration determines susceptibility to antimicrobials targeting the cell envelope.**

208 All *epa* transposon insertions were combined with four other mutations present in the in  
209 *OPDV* strain (*oatA*, *pgdA*, *dltA* and *sigV*), leaving the possibility of epistatic interactions  
210 between these mutations. To avoid this potential issue, we built in-frame *epa* deletions in the  
211 OG1RF genetic background (S5 Fig) before testing the impact of EPA decorations on  
212 resistance to antimicrobials targeting the cell envelope (Fig 5). All *epa* mutants were more  
213 sensitive to SDS than OG1RF, mutants  $\Delta 11714$  and  $\Delta 11707$  being less sensitive than the two  
214 others. Interestingly, mutant  $\Delta 11714$  ( $\Delta epaX$ -like) was the only one that did not display  
215 increased susceptibility to sodium cholate, a primary bile salt. Mutant  $\Delta 11720$  was the only  
216 one with an increased susceptibility to both polymyxin B and nisin, two cationic peptides  
217 targeting the cell envelope. Mutants  $\Delta 11707$  and  $\Delta 11715$  were more susceptible to polymyxin  
218 B than the wild-type strain, but barely more susceptible to nisin. Finally, deletion of  
219 *OGIRF\_11714* had no detectable impact on resistance to either of the CAMPs tested. Taken  
220 together, these results indicated that genes in the *epa* variable region are required for  
221 resistance to antimicrobials targeting the cell envelope.

222

### **The decoration of the EPA rhamnopolysaccharide is essential for virulence and underpins phagocyte evasion.**

223



## EPA decoration is essential for virulence

226 The impact of *epa* mutations on *E. faecalis* virulence was tested in the zebrafish experimental  
227 model of infection (Fig 6). Cell suspensions corresponding to approximately 1,200 CFUs  
228 were injected in the bloodstream of LWT embryos 30 h post fertilization (hpf) and the  
229 survival of larvae was monitored for 90 h post infection (hpi). As a preliminary experiment,  
230 we analysed the virulence of the *OPDV* transposon mutants (S6 Fig). Each *epa* transposon  
231 mutant had a significantly reduced virulence as compared to the wild-type OG1RF strain.  
232 Even though the combined deletions in *oatA*, *pgdA*, *dltA* and *sigV* did not impair the  
233 virulence of *E. faecalis* in the zebrafish model of infection (S7 Fig), we could not exclude the  
234 possibility of an epistatic relation between the *OPDV* and *epa* mutations. We therefore  
235 repeated the zebrafish infections using the in-frame *epa* deletion mutants in the wild-type  
236 OG1RF genetic background (S5 Fig). All *epa* mutants showed a significant decrease in  
237 virulence as compared to the wild-type OG1RF (Fig 6), killing only between 0-10% of the  
238 larvae as opposed to the 40 to 55% of killing following injection of the wild-type strain; Fig  
239 6A-D). As expected, the complementation of each *epa* deletion fully restored the virulence.  
240 Although the *epa* deletion mutants (except the  $\Delta epaX$ -like strain) present a slight defect in  
241 their growth rate, it is unlikely that this accounts for the lack of virulence; all complemented  
242 strains (and the wild-type OG1RF harbouring an empty complementation vector) also present  
243 a growth defect (S8 Fig) and yet kill zebrafish larvae as well as the wild-type strain (Fig 6).  
244 The production of EPA has been associated with an increased resistance to phagocytosis,  
245 which represents a key step during pathogenesis [8, 27]. We therefore quantified  
246 phagocytosis in zebrafish larvae infected with the wild-type OG1RF and one representative  
247 *epa* mutant (*OG1RF\_Δ11714*, *epaX-like*) expressing the red fluorescent protein mCherry (Fig  
248 7). Confocal microscopy images were used to measure bacterial uptake by phagocytes  
249 labelled with anti L-plastin antibodies coupled to Alexa-488, a green fluorophore, as  
250 previously described [28]. The ratio between red fluorescence inside to red fluorescence  
251 outside phagocytes was significantly higher for the *epaX-like* mutant (*OG1RF\_Δ11714*) than  
252 for the wild-type strain (\*\* $P=0.0006$ ) or the complemented strain (*OG1RF Δ11714* +  
253 pTetH-*OG1RF\_11714*; \*\* $P = 0.0049$ ). As expected, no difference in phagocytosis was  
254 observed between the wild-type and complemented strains (ns,  $P>0.05$ ) (Fig 7A).  
255 Representative pictures shown in Fig 7B-D clearly indicate that unlike the wild-type strain,  
256 the *epaX-like* mutant was no longer able to evade phagocytes.  
257 Altogether, our data therefore indicate that decoration of the EPA polysaccharide is essential  
258 for *E. faecalis* pathogenesis.

259

## 260 **Discussion**

261 Previous studies revealed that *E. faecalis* resistance to lysozyme is unusually complex and  
262 results from several mechanisms acting synergistically. These include peptidoglycan *O*-  
263 acetylation and de-*N*-acetylation, D-alanylation of teichoic acids and transcriptional control  
264 by the extracytoplasmic sigma factor SigV. Despite a 100-fold decrease as compared to the  
265 wild-type strain, the residual resistance of the quadruple *OPDV* mutant is still relatively high  
266 (MIC=0.5 mg ml<sup>-1</sup>) as compared to other Firmicutes. This result contrasts with other bacteria  
267 in which a limited number of genes play a key role in resistance. For example, the combined  
268 deletions of *oatA* and *dltA* in *S. aureus* led to a decrease of at least 2,000-fold in resistance as  
269 compared to parental strain [13]. Deletion of *pgdA* alone in *L. monocytogenes* is associated  
270 with a 32-fold decrease resistance.

271 Using random transposon mutagenesis, we showed that several genes located downstream the  
272 conserved *epaA-epaR* region modulate susceptibility to lysozyme. It was proposed that *epaA*-  
273 *epaR* encode a core synthetic machinery whilst downstream genes contribute to the  
274 decoration of EPA rhamnopolysaccharide [22, 24]. In agreement with previous studies, three  
275 distinct polysaccharide bands (named PS1, PS2 and PS3) were detected on polyacrylamide  
276 gels ([8] and Fig 3A). The two upper bands simultaneously disappeared in all the transposon  
277 mutants, suggesting that both are structurally related to EPA. The nature of the third band is  
278 unknown and could be either a metabolic intermediate of EPA or an unrelated polymer. The  
279 lack of detection of PS1 and PS2 in EPA polysaccharides from mutants suggested that either  
280 their charge did not allow them to enter the gel and/or that they were no longer stained by the  
281 cationic dye alcian blue. A similar result was previously described for mutants harbouring  
282 deletions in *OG1RF\_11715* (*epaOX*) [23] and the homolog of *OG1RF\_11714* in V583 (*epaX*)  
283 [24]. By comparing the electrophoretic mobility of the transposon mutants to that of the  
284 parental *OPDV* strain, we confirmed that the *epa* genes downstream of the *epaA-epaR* locus  
285 contribute to the negative charge of the EPA polysaccharide. This negative charge could at  
286 least in part be due to the presence of phosphate in the polymer. Interestingly, the OG1RF  
287 and *OPDV* strains displayed similar electrophoretic mobilities. Previous studies also showed  
288 that alanylation of teichoic and/or lipoteichoic acids in *L. lactis* had no detectable impact on  
289 the electrophoretic mobility of this organism [29]. The *dlt* operon has been shown to modify  
290 lipoteichoic acids [17]. Since these polymers are embedded inside the cell wall, it is likely  
291 that their modification does not lead to a change in the bacterial surface charge. Further  
292 experiments are required to test whether alanylation of cell wall polymers only has a

## EPA decoration is essential for virulence

293 moderate impact on the charge of the cell wall or if such modifications can simply not be  
294 detected by measuring electrophoretic mobility. Three of the mutants identified in this work  
295 carry a transposon in genes encoding putative glycosyl transferases. Despite the low amino  
296 acid identity between the glycosyl transferase sequences (19-27% depending on the  
297 comparison), these proteins have very similar predicted secondary structures, with two  
298 transmembrane domains and both the N- and C-termini exposed at the cell surface. Tertiary  
299 structure predictions suggest that all 3 proteins have a very similar fold and are GalNAc  
300 transferases. These predictions are in agreement with our NMR and sugar analyses indicating  
301 that EPA polysaccharides from all glycosyl transferase mutants (*OPDV\_11720*,  
302 *OPDV\_11715* and *OPDV\_11714*) contain less GalNAc and less intense *N*-acetyl proton  
303 signals. In addition to a reduced amount of GalNAc, EPA polymers from the glycosyl  
304 transferase mutants also contained a reduced amount of galactose. Further analyses are  
305 required to explore the catalytic activity of these glycosyl hydrolases. It remains unclear  
306 whether they can use distinct sugars as a substrate or if the addition of GalNAc is required for  
307 the activity of other glycosyl transferases adding Gal residues. Since none of the heterologous  
308 complementations of the transposon mutants were able to restore the parental phenotype, we  
309 anticipate that the 3 glycosyl transferases identified play distinct roles. This idea is supported  
310 by several independent observations: (i) mutants *OPDV\_11720::Tn2.5*,  
311 *OPDV\_11715::Tn2.13* and *OPDV\_11714::Tn2.14* present distinct alterations in their EPA  
312 carbohydrate compositions and the deletion mutants present differences in their antimicrobial  
313 susceptibility profiles; (ii) 2D-NMR spectra indicate that each mutation is associated with  
314 distinct modifications of the signals in the anomeric region; (iii) the *OPDV\_11714::Tn2.14*  
315 (*epaX-like*) mutant behaved differently from the other *epa* mutants studied since it displayed  
316 a less pronounced defect in surface charge. Altogether, our results suggest that  
317 glycosyltransferases in the *epa* variable region fulfil distinct roles. The complexity of EPA  
318 structure precludes any conclusion about the specific role of individual *epa* genes. However,  
319 based on the 2D NMR spectra, it is tempting to assume that *OGIRF\_11720*, the first gene of  
320 the *epa* variable region encodes a glycosyl transferase that is adding the entire EPA  
321 decorations, whilst EpaOX and EpaX contribute to the transfer of smaller decorations.  
322 *epa* deletion mutants displayed distinct resistance to antimicrobials targeting the cell  
323 envelope. Deletion of *OGIRF\_11720*, which had the most pronounced impact on EPA  
324 structure led to the most pronounced increased susceptibility to antimicrobials. Deletion of  
325 *OGIRF\_11714* (*epaX*), which had the least pronounced impact on EPA structure only led to  
326 an increased susceptibility to SDS. Since *epa* mutations could confer resistance to both

## EPA decoration is essential for virulence

327 negatively charged antimicrobials and CAMPs, these results suggested that the charge of  
328 EPA does not entirely account for the resistance to these compounds. We therefore speculate  
329 that EPA decorations are critical to maintain cell integrity, as previously suggested [23, 24].  
330 A contribution of *epa* decoration genes in biofilm formation [30], resistance to antimicrobials  
331 [23] and colonisation [24] was previously suggested, but no information was available on a  
332 potential role in the context of pathogeny. *E. faecalis* pathogenesis in the zebrafish model of  
333 infection involves two critical steps: phagocyte evasion and tissue damage caused by the  
334 metalloprotease GelE [27]. Since *oatA*, *pgdA*, *dltA* and *sigV* are unlikely to contribute to these  
335 processes, it was expected that their simultaneous deletion would have a very limited impact  
336 on virulence. By contrast, EPA has been reported to mediate resistance to phagocytic killing  
337 [8] and plays a critical role in virulence both in experimental mouse and zebrafish infections  
338 [27, 31]. We therefore hypothesized that *epa* mutations altering the decoration of EPA would  
339 impair virulence. In agreement with this hypothesis, all *epa* transposon mutants (in the *OPDV*  
340 background) and in-frame deletions in the wild-type OG1RF background were avirulent in  
341 the zebrafish model of infection. Further investigations revealed that the *epaX* mutation leads  
342 to a significant increase in *E. faecalis* uptake by phagocytes, suggesting that the decoration of  
343 EPA mediates immune evasion and underpins virulence.

344 Collectively, the results provide a paradigm shift in our understanding of *E. faecalis*  
345 pathogenesis, revealing that the modifications of EPA, rather than EPA backbone itself,  
346 underpin phagocyte evasion, an essential step during host infection. Whether *epa* is directly  
347 recognized by the host immune system or is shielding other surface components remains an  
348 open question.

349

350 **Materials and methods**

351

352 **Ethics statement**

353 Animal work was carried out according to guidelines and legislation set out in UK law in the  
354 Animals (Scientific Procedures) Act 1986 under Project License P1A417A5E. Ethical  
355 approval was granted by the University of Sheffield Local Ethical Review Panel.

356

357 **Bacterial strains, plasmids and growth conditions.**

358 Bacterial strains, plasmids and oligonucleotides used in this study are described in S3 Table.  
359 All strains were routinely grown at 37°C in Brain Heart Infusion (BHI) broth or BHI-agar  
360 1.5 % (w/v) plates unless otherwise stated. For *E. coli*, erythromycin was added at a final  
361 concentration of 200 µg ml<sup>-1</sup> to select pTetH derivatives. When necessary, *E. faecalis* was  
362 grown in the presence of 10 µg ml<sup>-1</sup> chloramphenicol, 128 µg ml<sup>-1</sup> gentamicin or 30 µg ml<sup>-1</sup>  
363 erythromycin. For complementation experiments, anhydrotetracycline was used at a final  
364 concentration of 10 ng ml<sup>-1</sup> to induce gene expression.

365

366 **Construction of the *OPDV* strain.**

367 The work describing the contribution of *oatA*, *pgdA*, *dltA* and *sigV* to lysozyme resistance  
368 was carried out using *E. faecalis* JH2-2 as a genetic background [16, 19]. Since this  
369 laboratory strain is avirulent in the zebrafish model of infection, we decided to use OG1RF as  
370 a parental strain [32]. The quadruple OG1RF mutant harbouring deletions in *oatA*, *pgdA*, *dltA*  
371 and *sigV* was built using existing plasmids (S3 Table) to create in-frame deletions in the  
372 following order: *oatA*, *pgdA*, *dltA* and *sigV*.

373

374 **Transposon mutagenesis.**

375 A *Mariner*-based transposon mutagenesis system previously described was used [21].  
376 Plasmid pZXL5 was introduced in *E. faecalis* *OPDV* by electroporation and transformants  
377 were selected at 28°C on plates containing chloramphenicol and gentamicin. Cells harbouring  
378 pZXL5 were grown to mid-exponential phase at 28°C and transposition was induced by  
379 addition of nisin (25 ng ml<sup>-1</sup>). The culture was then transferred to 42°C overnight to counter-  
380 select the replication of the plasmid. The library was then amplified by growing the cells at  
381 42°C in the presence of gentamicin.

382

383 **Transposon mutagenesis.**

EPA decoration is essential for virulence

384 A *Mariner*-based transposon mutagenesis system previously described was used [21].  
385 Plasmid pZXL5 was introduced in *E. faecalis* OPDV by electroporation and transformants  
386 were selected at 28°C on plates containing chloramphenicol and gentamicin. Cells harbouring  
387 pZXL5 were grown to mid-exponential phase at 28°C and transposition was induced by  
388 addition of nisin (25 ng ml<sup>-1</sup>). The culture was then transferred to 42°C overnight to counter-  
389 select the replication of the plasmid. The library was then amplified by growing the cells at  
390 42°C in the presence of gentamicin.

391

#### 392 **Isolation of transposon mutants resistant to lysozyme.**

393 Serial dilutions of the transposon library were plated on BHI agar plates containing 1, 2 or 4  
394 times the lysozyme MIC for the OPDV strain (0.5 mg ml<sup>-1</sup>) and gentamicin. After 24 to 48 h  
395 at 42°C, individual colonies growing at the highest concentration (2 mg ml<sup>-1</sup>) were chosen for  
396 further characterisation.

397

#### 398 **Mapping transposition sites.**

399 Transposon insertion sites were mapped by reverse PCR using two divergent primers  
400 (Mar\_up and Mar\_dn) on the transposon (S9A Fig). Chromosomal DNA was extracted using  
401 the Promega Wizard kit and digested by SspI in a final volume of 30 µl at a concentration of  
402 4 ng µl<sup>-1</sup> (S9B Fig). Digestion products were further diluted to 1 ng µl<sup>-1</sup> and self-ligated at  
403 16°C for 16 h after addition of 100 U of T4 DNA ligase (NEB) (S9C Fig). Three microliters  
404 of the ligation product were used as a template for PCR amplification using oligonucleotides  
405 Mar\_up and Mar\_dn (S9D Fig). PCR products were gel extracted and sequenced using  
406 oligonucleotide T7 (S9E Fig). The insertion site was defined as the first nucleotide of the *E.*  
407 *faecalis* OG1RF genome immediately downstream of the inverted repeat sequence flanking  
408 the transposon.

409

#### 410 **Construction of complementation plasmids.**

411 DNA fragments encoding OG1RF\_11720, OG1RF\_11715, OG1RF\_11714 and  
412 OG1RF\_11707 were amplified by PCR using the oligonucleotides described in S3 Table.  
413 PCR products were digested by NcoI and BamHI and cloned into pTetH, a pAT18 derivative  
414 allowing anhydrotetracycline-inducible expression (S. Mesnage, unpublished). Each open  
415 reading frame was fused to a C-terminal 6-Histidine tag.

416

#### 417 **Antimicrobial assays.**

## EPA decoration is essential for virulence

418 Colonies from a BHI agar plate were resuspended in PBS and diluted to an OD of 1 at  
419 600 nm. Ten-fold dilutions were prepared in PBS and 1.5  $\mu$ l of each cell suspension were  
420 spotted on BHI agar containing antimicrobials at various concentrations. MICs of lysozyme  
421 were defined as the concentration of antimicrobial inhibiting the growth of 1.5  $\mu$ l of a cell  
422 suspension corresponding to a 1000-fold dilution of the cell suspension at OD of 1 at 600 nm.  
423 For complementation experiments, anhydrotetracycline was added at a final concentration of  
424 10 ng ml<sup>-1</sup>. At least two biological replicates were carried out for each susceptibility assay.

425

### 426 **Measurement of electrophoretic mobility.**

427 An overnight culture was diluted 1000-fold in 25 ml of BHI broth and grown for 17 h at 37°C  
428 in static conditions. Anhydrotetracycline (100 ng ml<sup>-1</sup>) was added to all cultures to induce  
429 gene expression for complementation and exclude the possibility that this chemical could  
430 account for differences between strains. Cells were harvested by centrifugation (5 min,  
431 8,000 x g at room temperature), washed twice in 25 ml of 1.5 mM NaCl and resuspended at a  
432 concentration of 3x10<sup>7</sup> CFU ml<sup>-1</sup> in 1.5 mM NaCl at various pHs. The electrophoretic  
433 mobility was measured in an electric field of 8 V cm<sup>-1</sup> using a laser zetaphoremeter (CAD  
434 Instrumentation, Les Essarts le Roy, France). For each measurement, results were based on  
435 the analysis of 200 individual particles. The results presented in Fig 3, S1 and S2 Tables are  
436 the combined results of three independent experiments (biological replicates).

437

### 438 **NMR.**

439 NMR experiments were conducted on a Bruker DRX-600 (plus cryoprobe) spectrometer at  
440 25°C. EPA polysaccharides were freeze-dried and resuspended in D<sub>2</sub>O. Spectra were  
441 processed and analysed using TOPSPIN (version 2.1). Trimethylsilylpropanoic acid was used  
442 as a reference.

443

### 444 **Carbohydrate extraction and analyses.**

445 EPA was extracted as previously described from standing cultures in BHI at the end of  
446 exponential growth (OD<sub>600nm</sub>=0.8) [25]. The method previously described to analyse  
447 pneumococcal polysaccharides and conjugates was followed, with the exception of the first  
448 acid hydrolysis step [33] Briefly, purified EPA polysaccharides were hydrolyzed in 4 N  
449 trifluoroacetic acid for 4 h at 100°C. Hydrolysis products were analysed by high-performance  
450 anion-exchange chromatography (HPAEC) coupled to pulsed-amperometric detection (PAD)  
451 using a Dionex DX 500 BioLC system (ThermoFisher). Monosaccharides were separated on



EPA decoration is essential for virulence

452 a Carbowpac PA10 (4 mm × 250 mm) analytical column (ThermoFisher Scientific) at a flow  
453 rate of 1 ml min<sup>-1</sup>. Solvent A was 18 mM NaOH, solvent B was 100 mM NaOH, and solvent  
454 C was 100 mM NaOH containing 1 M sodium acetate. NaOH and NaAc gradients were used  
455 simultaneously to elute the carbohydrates by mixing the three eluents. The gradients used  
456 were as follows: after 15 min of isocratic elution in buffer A, a 3 min gradient to 100 % of  
457 buffer B was applied. A second gradient was applied between 18 and 35 min using buffer C  
458 to reach 300 mM sodium acetate. The column was re-equilibrated in 18 mM NaOH for 20  
459 min after every run. The following pulse potentials and durations were used:  $E1 = 0.1V$ ,  $t1 =$   
460  $400\text{ ms}$ ;  $E2 = -2V$ ,  $t2 = 20\text{ ms}$ ;  $E3 = 0.6V$ ,  $t3 = 10\text{ ms}$ ;  $E4 = -0.1V$ ,  $t4 = 70\text{ ms}$ . Data were  
461 collected and analysed on computers equipped with the Dionex PeakNet software.  
462 Carbohydrate analyses were made in triplicate using three independent EPA extractions from  
463 3 distinct colonies.

464

#### 465 **Construction of pGhost derivatives for allele replacement**

466 All plasmids for allele replacement were constructed with the same strategy. Two homology  
467 regions were amplified: the 5' homology region (referred to as H1) was amplified with  
468 oligonucleotides H11 (sense) and H12 (antisense). The 3' homology region (referred to as  
469 H2) was amplified with oligonucleotides H21 (sense) and H22 (antisense). Both PCR  
470 products were purified, mixed in an equimolar ratio and fused by overlap extension using  
471 oligonucleotides H11 and H22 [34]. The assembled PCR fragment flanked by two restriction  
472 sites was digested and cloned into pGhost9 [35] similarly digested. Oligonucleotide  
473 sequences and restriction sites used for cloning are described in S3 Table.

474

#### 475 **Construction of *E. faecalis* OG1RF in-frame *epa* mutants**

476 Isogenic derivatives of *E. faecalis* OG1RF were constructed by allele exchange using the  
477 procedure previously described [36]. Briefly, pGhost9 derivatives were electroporated into  
478 OG1RF and transformants were selected at a permissive temperature (28°C) on BHI plates  
479 with erythromycin. To induce single crossover recombination, transformants were grown at a  
480 non-permissive temperature (42°C) in the presence of erythromycin. The second  
481 recombination event leading to plasmid excision was obtained after 5 serial subcultures at  
482 28°C without erythromycin. The last overnight subculture was plated at 42°C without  
483 erythromycin. A clone harboring a double crossover mutation was identified by PCR (S5 Fig)  
484 and further confirmed by sequencing of the recombined region.

485



EPA decoration is essential for virulence

486 **Zebrafish strains and maintenance.**

487 London wild type (LWT) zebrafish were provided by the aquarium facility at the University  
488 of Sheffield. Embryos were maintained in E3 medium at 28°C according to standard  
489 procedures previously described [37].

490

491 **Microinjections of *E. faecalis* in zebrafish embryos.**

492 Cells were grown to mid-exponential phase ( $OD_{600nm} \sim 0.3$ ) and harvested by centrifugation  
493 (5,000 x *g* for 10 min at room temperature). Bacteria were resuspended in filtered phosphate  
494 buffer saline (150 mM Na<sub>2</sub>HPO<sub>4</sub>, 20 mM KH<sub>2</sub>PO<sub>4</sub>, 150 mM NaCl [pH 7.5], PBS) and  
495 transferred to microcapillary pipettes. Embryos at 30 h post fertilization (hpf) were  
496 anaesthetized, dechorionated, embedded in 3 % (w/v) methylcellulose and injected  
497 individually with 2 nl of a cell suspension corresponding to *ca.* 1,000 cells as previously  
498 described [27]. The number of cells injected was checked before and after each series of  
499 injections with a given strain. Zebrafish embryos were monitored at regular intervals until  
500 90 h post infection (hpi). At least 20 embryos per group were used.

501

502 **Imaging of infected larvae by confocal microscopy and quantification of uptake by**  
503 **phagocytes.**

504 Immuno-labelled embryos were immersed in 0.8 % (w/v) low melting point agarose in E3  
505 medium and mounted flat on FluoroDish™ (World Precision Instruments Inc.). Images were  
506 collected using a DMI8 confocal microscope (Leica). Image acquisition was performed with  
507 the Volocity software and the images were processed with ImageJ 1.49v software. Bacterial  
508 phagocytosis was quantified using an ImageJ custom script called Fish Analysis, which can  
509 be obtained from <http://sites.imagej.net/Willemsejj/> or via ImageJ updater. All bacteria were  
510 identified based on their fluorescence (mCherry, Channel 2). Subsequently, the fluorescence  
511 intensity of the phagocytes (Alexa 488, Channel 1) surrounding the phagocytosed bacteria  
512 was measured. The phagocytosed bacteria had high fluorescence intensity of Channel 2 and  
513 low fluorescence intensity of Channel 1. The area of phagocytosed bacteria was compared  
514 with the area of non-phagocytosed bacteria and their ratio was calculated.

515

516 **Statistical analyses.**

517 Statistical analyses were performed using GraphPad Prism version 7.03. Comparisons  
518 between survival curves were made using the log rank (Mantel-Cox) test. Electrophoretic  
519 mobilities were compared using two-way ANOVA Comparison of uptake by zebrafish

EPA decoration is essential for virulence

520 macrophages was carried out using an unpaired non-parametric Dunn's multiple comparison  
521 test.

522

523

524 **Acknowledgments**

525 The authors would like to thank Abdellah Benachour (University of Caen) for providing the  
526 plasmids used to construct the *OPDV* strain and the Bateson Centre aquaria staff for their  
527 assistance with zebrafish husbandry. The authors thank Dr Philip Elks for access to the  
528 confocal microscope and Paul Martin (University of Bristol) for the kind gift of anti L-plastin  
529 antibodies.

## References

- 530  
531  
532 1. Arias CA, Murray BE. The rise of the *Enterococcus*: beyond vancomycin resistance. *Nat Rev*  
533 *Microbiol.* 2012;10(4):266-278. doi: 10.1038/nrmicro2761. pmid: 22421879.
- 534 2. Sassoubre LM, Ramsey MM, Gilmore MS, Boehm AB. Transcriptional response of  
535 *Enterococcus faecalis* to sunlight. *J Photochem Photobiol B.* 2014;130:349-356. doi:  
536 10.1016/j.jphotobiol.2013.12.013. pmid: 24434819.
- 537 3. Ocvirk S, Sava IG, Lengfelder I, Lagkouvardos I, Steck N, Roh JH, et al. Surface-associated  
538 lipoproteins link *Enterococcus faecalis* virulence to colitogenic activity in IL-10-deficient mice  
539 independent of their expression levels. *PLoS Pathog.* 2015;11(6):e1004911. doi:  
540 10.1371/journal.ppat.1004911. pmid: 26067254.
- 541 4. Wang X, Yang Y, Huycke MM. Microbiome-driven carcinogenesis in colorectal cancer: Models  
542 and mechanisms. *Free Radic Biol Med.* 2017;105:3-15. doi:  
543 10.1016/j.freeradbiomed.2016.10.504. pmid: 27810411.
- 544 5. Hancock LE, Perego M. Systematic inactivation and phenotypic characterization of two-  
545 component signal transduction systems of *Enterococcus faecalis* V583. *J Bacteriol.*  
546 2004;186(23):7951-7958. pmid: 15547267.
- 547 6. Guzman Prieto AM, van Schaik W, Rogers MR, Coque TM, Baquero F, Corander J, et al. Global  
548 emergence and dissemination of enterococci as nosocomial pathogens: attack of the clones?  
549 *Front Microbiol.* 2016;7:788. doi: 10.3389/fmicb.2016.00788. pmid: 27303380.
- 550 7. Geiss-Liebisch S, Rooijackers SH, Beczala A, Sanchez-Carballo P, Kruszynska K, Repp C, et al.  
551 Secondary cell wall polymers of *Enterococcus faecalis* are critical for resistance to complement  
552 activation via mannose-binding lectin. *J Biol Chem.* 2012;287(45):37769-37777. doi:  
553 10.1074/jbc.M112.358283. pmid: 22908219.
- 554 8. Teng F, Jacques-Palaz KD, Weinstock GM, Murray BE. Evidence that the enterococcal  
555 polysaccharide antigen gene (epa) cluster is widespread in *Enterococcus faecalis* and influences  
556 resistance to phagocytic killing of *E. faecalis*. *Infect Immun.* 2002;70(4):2010-2015. pmid:  
557 11895965.
- 558 9. Thurlow LR, Thomas VC, Hancock LE. Capsular polysaccharide production in *Enterococcus*  
559 *faecalis* and contribution of CpsF to capsule serospecificity. *J Bacteriol.* 2009;191(20):6203-  
560 6210. doi: 10.1128/JB.00592-09. pmid: 19684130.
- 561 10. Aine E, Morsky P. Lysozyme concentration in tears--assessment of reference values in normal  
562 subjects. *Acta Ophthalmol (Copenh).* 1984;62(6):932-938. pmid: 6395619.
- 563 11. Hankiewicz J, Swierczek E. Lysozyme in human body fluids. *Clin Chim Acta.* 1974;57(3):205-  
564 209. pmid: 4434640.
- 565 12. Callewaert L, Michiels CW. Lysozymes in the animal kingdom. *J Biosci.* 2010;35(1):127-160.  
566 pmid: 20413917.

EPA decoration is essential for virulence

- 567 13. Herbert S, Bera A, Nerz C, Kraus D, Peschel A, Goerke C, et al. Molecular basis of resistance to  
568 muramidase and cationic antimicrobial peptide activity of lysozyme in staphylococci. *PLoS*  
569 *Pathog.* 2007;3(7):e102. pmid: 17676995.
- 570 14. Ibrahim HR, Thomas U, Pellegrini A. A helix-loop-helix peptide at the upper lip of the active site  
571 cleft of lysozyme confers potent antimicrobial activity with membrane permeabilization action. *J*  
572 *Biol Chem.* 2001;276(47):43767-43774. doi: 10.1074/jbc.M106317200. pmid: 11560930.
- 573 15. Hebert L, Courtin P, Torelli R, Sanguinetti M, Chapot-Chartier MP, Auffray Y, et al.  
574 *Enterococcus faecalis* constitutes an unusual bacterial model in lysozyme resistance. *Infect*  
575 *Immun.* 2007;75(11):5390-5398. doi: IAI.00571-07 [pii] 10.1128/IAI.00571-07. pmid:  
576 17785473.
- 577 16. Benachour A, Ladjouzi R, Le Jeune A, Hebert L, Thorpe S, Courtin P, et al. The lysozyme-  
578 induced peptidoglycan *N*-acetylglucosamine deacetylase PgdA (EF1843) is required for  
579 *Enterococcus faecalis* virulence. *J Bacteriol.* 2012;194(22):6066-6073. doi: 10.1128/JB.00981-  
580 12. pmid: 22961856.
- 581 17. Fabretti F, Theilacker C, Baldassarri L, Kaczynski Z, Kropec A, Holst O, et al. Alanine esters of  
582 enterococcal lipoteichoic acid play a role in biofilm formation and resistance to antimicrobial  
583 peptides. *Infect Immun.* 2006;74(7):4164-4171. doi: 10.1128/IAI.00111-06. pmid: 16790791.
- 584 18. Benachour A, Muller C, Dabrowski-Coton M, Le Breton Y, Giard JC, Rince A, et al. The  
585 *Enterococcus faecalis* sigV protein is an extracytoplasmic function sigma factor contributing to  
586 survival following heat, acid, and ethanol treatments. *J Bacteriol.* 2005;187(3):1022-1035. doi:  
587 187/3/1022 [pii] 10.1128/JB.187.3.1022-1035.2005. pmid: 15659680.
- 588 19. Le Jeune A, Torelli R, Sanguinetti M, Giard JC, Hartke A, Auffray Y, et al. The  
589 extracytoplasmic function sigma factor SigV plays a key role in the original model of lysozyme  
590 resistance and virulence of *Enterococcus faecalis*. *PLoS ONE.* 2010;5(3):e9658. doi:  
591 10.1371/journal.pone.0009658. pmid: 20300180.
- 592 20. McKenzie HA, White FH, Jr. Determination of lysozyme activity at low levels with emphasis on  
593 the milk enzyme. *Anal Biochem.* 1986;157(2):367-374. pmid: 3777441.
- 594 21. Zhang X, Paganelli FL, Bierschenk D, Kuipers A, Bonten MJ, Willems RJ, et al. Genome-wide  
595 identification of ampicillin resistance determinants in *Enterococcus faecium*. *PLoS Genet.*  
596 2012;8(6):e1002804. doi: 10.1371/journal.pgen.1002804. pmid: 22761597.
- 597 22. Palmer KL, Godfrey P, Griggs A, Kos VN, Zucker J, Desjardins C, et al. Comparative genomics  
598 of enterococci: variation in *Enterococcus faecalis*, clade structure in *E. faecium*, and defining  
599 characteristics of *E. gallinarum* and *E. casseliflavus*. *MBio.* 2012;3(1):e00318-00311. doi:  
600 10.1128/mBio.00318-11. pmid: 22354958.
- 601 23. Dale JL, Cagnazzo J, Phan CQ, Barnes AM, Dunny GM. Multiple roles for *Enterococcus*  
602 *faecalis* glycosyltransferases in biofilm-associated antibiotic resistance, cell envelope integrity,

EPA decoration is essential for virulence

- 603 and conjugative transfer. *Antimicrob Agents Chemother.* 2015;59(7):4094-4105. doi:  
604 10.1128/AAC.00344-15. pmid: 25918141.
- 605 24. Rigottier-Gois L, Madec C, Navickas A, Matos RC, Akary-Lepage E, Mistou MY, et al. The  
606 surface rhamnopolysaccharide epa of *Enterococcus faecalis* is a key determinant of intestinal  
607 colonization. *J Infect Dis.* 2015;211(1):62-71. doi: 10.1093/infdis/jiu402. pmid: 25035517.
- 608 25. Hancock LE, Gilmore MS. The capsular polysaccharide of *Enterococcus faecalis* and its  
609 relationship to other polysaccharides in the cell wall. *Proc Natl Acad Sci U S A.*  
610 2002;99(3):1574-1579. doi: 10.1073/pnas.032448299 99/3/1574 [pii]. pmid: 11830672.
- 611 26. Briandet R, Meylheuc T, Maher C, Bellon-Fontaine MN. *Listeria monocytogenes* Scott A: cell  
612 surface charge, hydrophobicity, and electron donor and acceptor characteristics under different  
613 environmental growth conditions. *Appl Environ Microbiol.* 1999;65(12):5328-5333. pmid:  
614 10583984.
- 615 27. Prajsnar TK, Renshaw SA, Ogryzko NV, Foster SJ, Serror P, Mesnage S. Zebrafish as a novel  
616 vertebrate model to dissect enterococcal pathogenesis. *Infect Immun.* 2013;81(11):4271-4279.  
617 doi: 10.1128/IAI.00976-13. pmid: 24002065.
- 618 28. Salamaga B, Prajsnar TK, Jareno-Martinez A, Willemse J, Bewley MA, Chau F, et al. Bacterial  
619 size matters: Multiple mechanisms controlling septum cleavage and diplococcus formation are  
620 critical for the virulence of the opportunistic pathogen *Enterococcus faecalis*. *PLoS Pathog.*  
621 2017;13(7):e1006526. doi: 10.1371/journal.ppat.1006526. pmid: 28742152.
- 622 29. Giaouris E, Briandet R, Meyrand M, Courtin P, Chapot-Chartier MP. Variations in the degree of  
623 D-Alanylation of teichoic acids in *Lactococcus lactis* alter resistance to cationic antimicrobials  
624 but have no effect on bacterial surface hydrophobicity and charge. *Appl Environ Microbiol.*  
625 2008;74(15):4764-4767. doi: 10.1128/AEM.00078-08. pmid: 18539809.
- 626 30. Dale JL, Nilson JL, Barnes AMT, Dunny GM. Restructuring of *Enterococcus faecalis* biofilm  
627 architecture in response to antibiotic-induced stress. *NPJ Biofilms Microbiomes.* 2017;3:15. doi:  
628 10.1038/s41522-017-0023-4. pmid: 28685097.
- 629 31. Teng F, Singh KV, Bourgoigne A, Zeng J, Murray BE. Further characterization of the epa gene  
630 cluster and Epa polysaccharides of *Enterococcus faecalis*. *Infect Immun.* 2009;77(9):3759-3767.  
631 doi: 10.1128/IAI.00149-09. pmid: 19581393.
- 632 32. Dunny GM, Brown BL, Clewell DB. Induced cell aggregation and mating in *Streptococcus*  
633 *faecalis*: evidence for a bacterial sex pheromone. *Proc Natl Acad Sci U S A.* 1978;75(7):3479-  
634 3483. pmid: 98769.
- 635 33. Talaga P, Vialle S, Moreau M. Development of a high-performance anion-exchange  
636 chromatography with pulsed-amperometric detection based quantification assay for  
637 pneumococcal polysaccharides and conjugates. *Vaccine.* 2002;20(19-20):2474-2484. pmid:  
638 12057602.

EPA decoration is essential for virulence

- 639 34. Ho SN, Hunt HD, Horton RM, Pullen JK, Pease LR. Site-directed mutagenesis by overlap  
640 extension using the polymerase chain reaction. *Gene*. 1989;77(1):51-59. pmid: 2744487.
- 641 35. Maguin E, Duwat P, Hege T, Ehrlich D, Gruss A. New thermosensitive plasmid for gram-  
642 positive bacteria. *J Bacteriol*. 1992;174(17):5633-5638. pmid: 1324906.
- 643 36. Mesnage S, Chau F, Dubost L, Arthur M. Role of *N*-acetylglucosaminidase and *N*-  
644 acetylmuramidase activities in *Enterococcus faecalis* peptidoglycan metabolism. *J Biol Chem*.  
645 2008;283(28):19845-19853. doi: M802323200 [pii] 10.1074/jbc.M802323200. pmid: 18490448.
- 646 37. Nusseim-Volhard CDR. Zebrafish. A practical approach. New York, NY: Oxford University  
647 Press; 2002.

648

650 **Table 1. MIC of lysozyme for Firmicutes.**

| Strain                                                                                  | lysozyme MIC<br>(mg ml <sup>-1</sup> ) |     |
|-----------------------------------------------------------------------------------------|----------------------------------------|-----|
| <i>Staphylococcus aureus</i> COL                                                        | >16                                    | 654 |
| <i>Streptococcus gallolyticus</i> UCN34                                                 | >16                                    | 655 |
| <i>Streptococcus gordonii</i> DL-1 Challis                                              | >16                                    | 656 |
| <i>Streptococcus mutans</i> UA159                                                       | >16                                    | 657 |
| <i>Enterococcus faecium</i> DO                                                          | >16                                    | 658 |
| <i>Enterococcus hirae</i> ATCC9790                                                      | >16                                    | 659 |
| <i>Enterococcus faecalis</i> OG1RF                                                      | >16                                    | 660 |
| <i>Enterococcus faecalis</i> O ( $\Delta oatA$ )                                        | >16                                    | 661 |
| <i>Enterococcus faecalis</i> OP ( $\Delta oatA \Delta pgdA$ )                           | 16                                     | 662 |
| <i>Enterococcus faecalis</i> OPD ( $\Delta oatA \Delta pgdA \Delta dltA$ )              | 8                                      | 663 |
| <i>Enterococcus faecalis</i> OPDV ( $\Delta oatA \Delta pgdA \Delta dltA \Delta sigV$ ) | 0.5                                    | 664 |
| <i>Listeria monocytogenes</i> EGD                                                       | 4                                      | 665 |
| <i>Listeria monocytogenes</i> EGD $\Delta pgdA$                                         | 0.125                                  | 666 |
| <i>Lactococcus lactis</i> MG1363                                                        | 0.125                                  | 667 |
| <i>Bacillus subtilis</i> 168                                                            | 0.0312                                 | 668 |
| <i>Bacillus megaterium</i> KM                                                           | 0.0312                                 | 669 |
| <i>Lactobacillus cellobiosus</i> ATCC11739                                              | 0.0312                                 | 670 |
| <i>Aerococcus viridans</i> ATCC11563                                                    | 0.0312                                 | 671 |
| <i>Micrococcus luteus</i> ATCC4698                                                      | 0.0005                                 | 672 |

674

675

676

677

**Table 2. Complementation of *epa* transposon mutants.**

| Mutant             | Complementation gene |             |             |             |
|--------------------|----------------------|-------------|-------------|-------------|
|                    | OG1RF_11720          | OG1RF_11715 | OG1RF_11714 | OG1RF_11707 |
| OPDV_11720::Tn2.9  | +                    | ND          | ND          | ND          |
| OPDV_11720::Tn2.5  | +                    | -           | -           | -           |
| OPDV_11715::Tn2.10 | ND                   | +           | ND          | ND          |
| OPDV_11715::Tn2.13 | -                    | +           | -           | -           |
| OPDV_11715::Tn2.16 | -                    | +           | -           | -           |
| OPDV_11714::Tn2.14 | -                    | -           | +           | -           |
| OPDV_11720::Tn2.12 | ND                   | ND          | ND          | +           |
| OPDV_11720::Tn2.8  | ND                   | ND          | -           | +           |
| OPDV_11720::Tn2.6  | ND                   | ND          | ND          | +           |

678 <sup>a</sup>, Complementation was assessed on BHI-agar plates containing lysozyme at a concentration  
 679 of 0.5 mg ml<sup>-1</sup>

680 +, complementation restoring lysozyme sensitivity; -, no impact on lysozyme MIC;

681 ND, not determined.

682

683

684 **Figure legends**

685

686 **Figure 1. Identification of *epa* mutants resistant to lysozyme. A.** Description of individual  
687 transposon insertions. **B.** Mapping of transposon insertions in the *epa* variable region.  
688 Insertion sites are indicated by vertical arrows. ORFs in the *epa* variable region are depicted  
689 in grey.

690 **Figure 2. Growth defect of *E. faecalis* Tn mutants in the presence of antimicrobials**  
691 **targeting the cell envelope.** Cell suspensions were prepared as described in S1 Fig and  
692 1.5  $\mu$ l of serial dilutions were spotted on BHI-agar plates containing 10 ng ml<sup>-1</sup>  
693 anhydrotetracycline and various concentrations of lysozyme. Concentrations showing a clear  
694 difference in susceptibility are shown.

695 **Figure 3. Analysis of purified EPA polysaccharides and their contribution to cell**  
696 **surface charge. A.** Analysis of purified EPA by acrylamide gel electrophoresis. 40  $\mu$ g of  
697 material was loaded on a 10 % (v/v) acrylamide-bisacrylamide (33:0.8) gel and stained with  
698 the cationic dye alcian blue. **B.** Electrophoretic mobility of *E. faecalis* OG1RF, *OPDV* and  
699 insertion mutants resistant to lysozyme. Representative mutants harbouring a transposon  
700 insertion in *OG1RF\_11720* (*OPDV\_11720::Tn2.5*), *OG1RF\_11715* (*OPDV\_11715::Tn2.13*),  
701 *OG1RF\_11714* (*OPDV\_11714::Tn2.14*) or *OG1RF\_11707* (*OPDV\_11707::Tn2.8*) were  
702 analysed. Wild-type OG1RF and parental *OPDV* strains were included as controls. **C.**  
703 Carbohydrate composition of purified EPA polysaccharides. The relative percentage  
704 corresponding to each monosaccharide was determined from three independent extractions.

705 **Figure 4. Structural analysis of purified EPA polysaccharides. A.** 1D proton spectra of  
706 the EPA polysaccharides extracted from strains *OPDV*, *OPDV\_11720::Tn2.5*,  
707 *OPDV\_11715::Tn2.13*, *OPDV\_11714::Tn2.14* or *OPDV\_11707::Tn2.8*. The grey boxes  
708 indicate anomeric (4.5-5.5 ppm) and methyl protons (1.2-2.5 ppm). **B.** 2D <sup>1</sup>H-<sup>13</sup>C HSQC  
709 spectra of EPA polysaccharides. The region corresponding to anomeric protons (4.2-5.5 ppm)  
710 and anomeric carbons (90-105 ppm) is shown. *OPDV* signals are in black, mutant signals in  
711 red. Boxes show signals with a lower intensity or a shift in the mutant EPA samples. Close-  
712 up views of the boxed regions are shown in S4 Fig.

713 **Figure 5. Growth defect of *E. faecalis* OG1RF in frame *epa* mutants in the presence of**  
714 **antimicrobials targeting the cell envelope.** Cell suspensions were prepared as described in



## EPA decoration is essential for virulence

715 S1 Fig and 1.5  $\mu$ l of serial dilutions were spotted on BHI-agar plates containing 10 ng ml<sup>-1</sup>  
716 anhydrotetracycline and SDS, sodium cholate, polymyxin B or nisin. For each antimicrobial,  
717 one concentration showing a difference in susceptibility is shown.

718 **Figure 6. Virulence of *epa* mutants and complemented strains in the zebrafish model of**  
719 **infection.** Survival of zebrafish larvae (n>20) following infection with *E. faecalis* OG1RF  
720 (WT) and *epa* deletion mutants was monitored over 90 h post infection. **A.** Mutant  $\Delta I1720$ .  
721 **B.** Mutant  $\Delta I1715$ . **C.** Mutant  $\Delta I1714$ . **D.** Mutant  $\Delta I1707$ . **E.** Statistical significance  
722 determined by Log-rank test; ns,  $P>0.05$ ; \*\* $P<0.01$ ; \*\*\*  $P<0.001$ ; \*\*\*\*  $P<0.0001$ . All  
723 injections presented in Fig 4A and 4D were carried out on the same day. The same data  
724 corresponding to the OG1RF strain are therefore shown for the 2 experiments.

725 **Fig 7 *epaX* mutant cells are more prone to phagocytosis than wild-type and**  
726 **complemented cells.** **A.** Quantification of *E. faecalis* uptake by zebrafish phagocytes.  
727 Embryos were infected with 1,600 CFUs of *E. faecalis* cells constitutively producing  
728 mCherry and fixed in 4 % paraformaldehyde 1.5 h post infection. Phagocytes were  
729 immunolabelled using rabbit anti L-plastin antibodies and detected with goat anti-rabbit  
730 antibodies conjugated to Alexafluor 488. The infected and immunolabelled embryos were  
731 imaged using scanning confocal microscope. The ratio of mCherry fluorescence signal area  
732 associated with phagocytosed and free bacteria was measured using the Fish Analysis Fiji  
733 plugin. The uptake of mutant OG1RF  $\Delta I1714$  ( $\Delta epaX$ ) was significantly higher when  
734 compared to the wild-type (OG1RF; \*\*\* $P = 0.0006$ ) and complemented strain (OG1RF  
735  $\Delta I1714 + pTetH-OG1RF_{11714}$ ; \*\* $P = 0.0049$ ). No difference in phagocytosis was  
736 observed between the wild-type and complemented strains (ns,  $P>0.05$ ). Representative  
737 images showing *E. faecalis* uptake in zebrafish embryos are shown. Each picture corresponds  
738 to the quantification result indicated with a red dot in **A**, following infection with OG1RF  
739 (**B**), OG1RF  $\Delta I1714$  ( $\Delta epaX$ ) (**C**) and the complemented strain (**D**). Phagocytes labeled with  
740 L-plastin appear in green, mCherry labelled bacteria in red. Scale bar is 25  $\mu$ m.

741

## 742 Supporting information Legend

743 **S1 Figure. Lysozyme MICs for Firmicutes.** A cell suspension in phosphate saline buffer  
744 was adjusted to an OD at 600 nm of 1 and 1.5  $\mu$ l of serial dilutions were spotted on BHI-agar  
745 plates containing various concentrations of lysozyme. ND, undiluted cell suspension; 10<sup>-1</sup>,

EPA decoration is essential for virulence

746 10-fold dilution;  $10^{-2}$ , 100-fold dilution;  $10^{-3}$ , 1000-fold dilution;  $10^{-4}$ , 10000-fold dilution;  
747  $10^{-5}$ , 100000-fold dilution.

748 **S2 Figure. Western blot analysis of complementation strains.** Cultures were grown in BHI  
749 to an OD at 600 nm of 0.5 and expression of the *epa* genes was induced by addition of  
750 anhydrotetracycline ( $10 \text{ ng ml}^{-1}$ ). After 2 h, cells were harvested and mechanically broken in  
751 the presence of glass beads. Crude extracts (20 $\mu$ g) were loaded on SDS-PAGE, transferred  
752 onto a nitrocellulose membrane and probed with a polyclonal serum against the polyhistidine  
753 tag. Bands of the expected molecular weights were detected (OG1RF\_11707, 36.7 kDa;  
754 OG1RF\_11714, 38.9 kDa; OG1RF\_11715, 38.4 kDa; OG1RF\_11720, 30.8 kDa).

755 **S3 Figure. HPLC analysis of TFA-hydrolysed EPA polysaccharides.** Following gel  
756 filtration, fractions containing neutral sugars were pooled and freeze-dried. EPA was  
757 hydrolysed in the presence of 4 N TFA at 100°C for 4 h. Monosaccharides were separated on  
758 a carboxylic acid column by high performance anion exchange chromatography coupled to  
759 pulsed-amperometric detection. Representative chromatograms are shown for  
760 monosaccharide standards and each transposon mutant. EPA polysaccharides were extracted  
761 from three independent cultures to give average values in Fig 3C.

762 **S4 Figure.  $^1\text{H}$ - $^{13}\text{C}$  HSQC spectra showing signals altered in *epa* mutants.** **A.** Region  
763 corresponding to anomeric protons (4.2-5.5 ppm) and anomeric carbons (90-105 ppm)  
764 highlighting four regions of the spectra (boxed) with signals shifted or changing in intensity  
765 in the *epa* mutants. **B.** Boxed regions in A. are shown for individual mutant and one  
766 complemented strain.

767 **S5 Figure. PCR analysis of OG1RF derivatives harbouring in-frame deletions in**  
768 ***OG1RF\_11720*, *OG1RF\_11715*, *OG1RF\_11714* and *OG1RF\_11707*.**

769 **S6 Figure. Virulence of *epa* transposon mutants and complemented strains in the**  
770 **zebrafish model of infection.** Survival of zebrafish larvae (n>20) following infection with *E.*  
771 *faecalis* OG1RF (WT) and *epa* insertion mutant was monitored over 90h post infection.  
772 **A.** Mutant *OPDV\_11720::Tn2.5*. **B.** Mutant *OPDV\_11715::Tn2.13*. **C.** Mutant  
773 *OPDV\_11714::Tn2.14*. **D.** Mutant *OPDV\_11707::Tn2.8*. Statistical significance was  
774 determined by Log-rank test; NS,  $P>0.05$ ; \*\* $P<0.01$ ; \*\*\*  $P<0.001$ ; \*\*\*\*  $P<0.0001$ . The  
775 same data corresponding to the WT strain are shown in Fig4A/4C and Fig 4B/4D.

EPA decoration is essential for virulence

776 **S7 Figure. Comparative analysis of OG1RF and OPDV virulence in the zebrafish model**  
777 **of infection.** Survival of zebrafish larvae (n=28) following infection with 1,000 CFUs of *E.*  
778 *faecalis* OG1RF (WT) and *OPDV* mutant was monitored over 90 h post infection. The lack of  
779 statistical significance (P=0.645) was determined by Log-rank test.

780 **S8 Figure. Growth rate analysis of *E. faecalis* OG1RF and *epa* derivatives.** Cells from  
781 overnight cultures in BHI were diluted to an OD at 600 nm of 0.01 in 25 ml BHI and growth  
782 of standing cultures was monitored over 6 h. The data presented are the average of 3  
783 independent cultures. The same OG1RF growth curves were used as a control in each graph.

784 **S9 Figure. Step-by-step description of the transposon mapping strategy. A.** Schematic  
785 representation of the *mariner* transposon used. It consists of a gentamycin resistance cassette  
786 flanked by two inverted repeats. **B.** Step 1: digestion of chromosomal DNA with SspI, which  
787 has a unique cleavage site in the gentamycin resistance cassette. **C.** step 2: self-ligation of  
788 SspI digestion products. **D.** step 3: reverse PCR on ligation products with two divergent  
789 oligonucleotides (Mar\_dn and Mar\_up). **E.** step 4: sequencing of the PCR product using  
790 oligonucleotide T7.

791

792 **S1 Table. Electrophoretic mobility measurements.** The values presented are the average of  
793 three independent biological replicates  $\pm$  standard deviation.

794

795 **S2 Table. Statistical significance of pairwise comparisons of electrophoretic mobility.**  
796 The significance values have been calculated using two-way ANOVA.

797

798 **S3 Table. Bacterial strains, plasmids and oligonucleotides used in this study.**

**A**

| Disrupted gene     | V583 homolog               | Insertion site    | Mutant                    | Putative function     |
|--------------------|----------------------------|-------------------|---------------------------|-----------------------|
| <i>OG1RF_11720</i> | <i>EF2176</i> <sup>a</sup> | nt 392 of 759     | <i>OPDV_11720::Tn2.9</i>  | Glycosyl transferase  |
| <i>OG1RF_11720</i> |                            | nt 619 of 759     | <i>OPDV_11720::Tn2.5</i>  | Glycosyl transferase  |
| <i>OG1RF_11715</i> | <i>EF2170</i> <sup>b</sup> | nt 43 of 978      | <i>OPDV_11715::Tn2.10</i> | Glycosyl transferase  |
| <i>OG1RF_11715</i> |                            | nt 553 of 978     | <i>OPDV_11715::Tn2.13</i> | Glycosyl transferase  |
| <i>OG1RF_11715</i> |                            | nt 925 of 978     | <i>OPDV_11715::Tn2.16</i> | Glycosyl transferase  |
| <i>OG1RF_11714</i> | <i>EF2170</i> <sup>c</sup> | nt 478 of 981     | <i>OPDV_11714::Tn2.14</i> | Glycosyl transferase  |
| <i>OG1RF_11707</i> | <i>EF2165</i> <sup>d</sup> | 50nt upstream ATG | <i>OPDV_11707::Tn2.12</i> | Epimerase/dehydratase |
| <i>OG1RF_11707</i> |                            | 24nt upstream ATG | <i>OPDV_11707::Tn2.8</i>  | Epimerase/dehydratase |
| <i>OG1RF_11707</i> |                            | nt 828 of 951     | <i>OPDV_11707::Tn2.6</i>  | Epimerase/dehydratase |

<sup>a</sup> *OG1RF\_11720* and *EF2176* share 99.6 % identity and 100 % similarity;

<sup>b</sup> *OG1RF\_11715* (*EpaOX*) and *EF2170* (*EpaX*) share 28 % identity and 45 % similarity;

<sup>c</sup> *OG1RF\_11714* (*EpaX*-like) and *EF2170* (*EpaX*) share 53 % identity, 61 % similarity;

<sup>d</sup> *OG1RF\_11707* and *EF2165* share 97.5 % identity and 98 % similarity

**B**

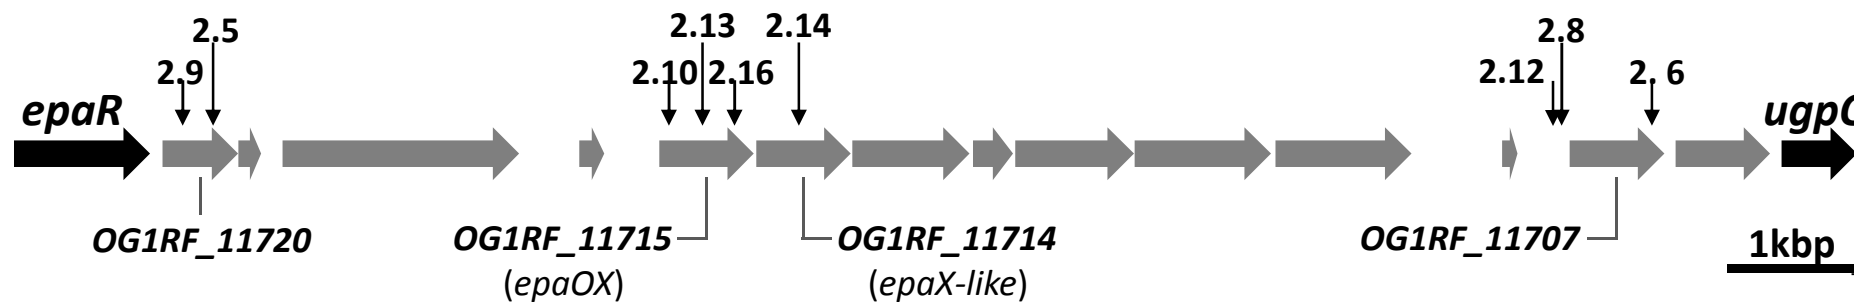

**Figure 1**



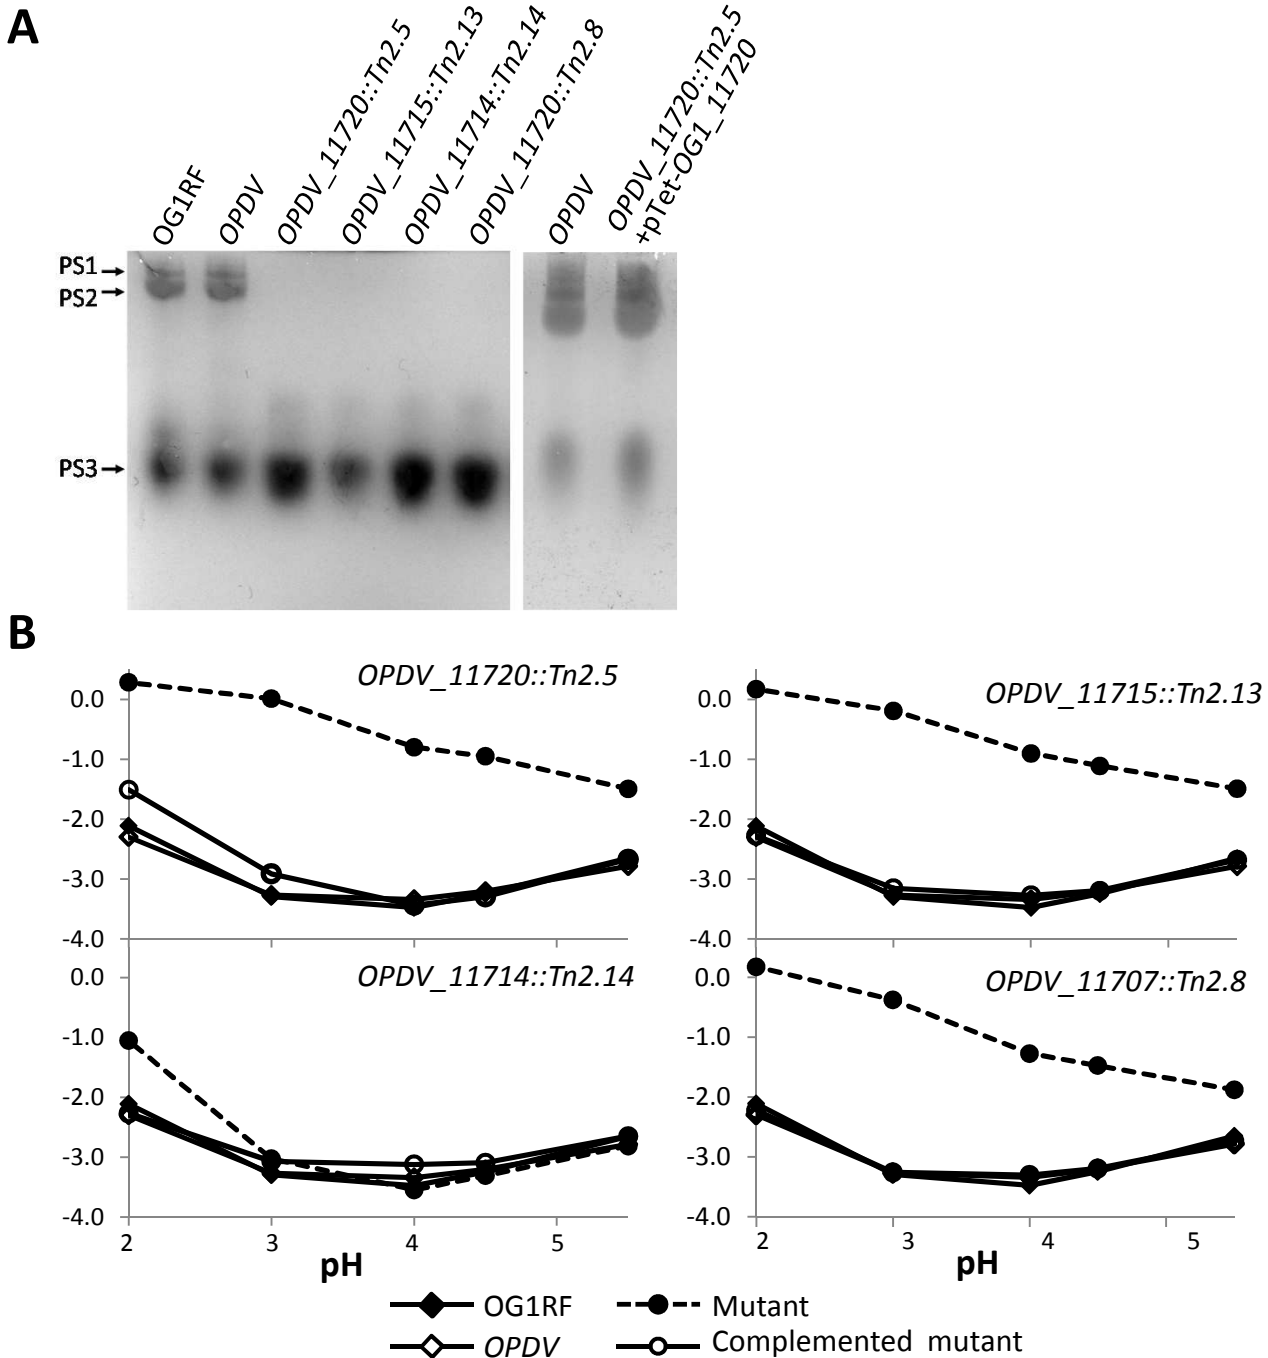

**Figure 3**

**A**

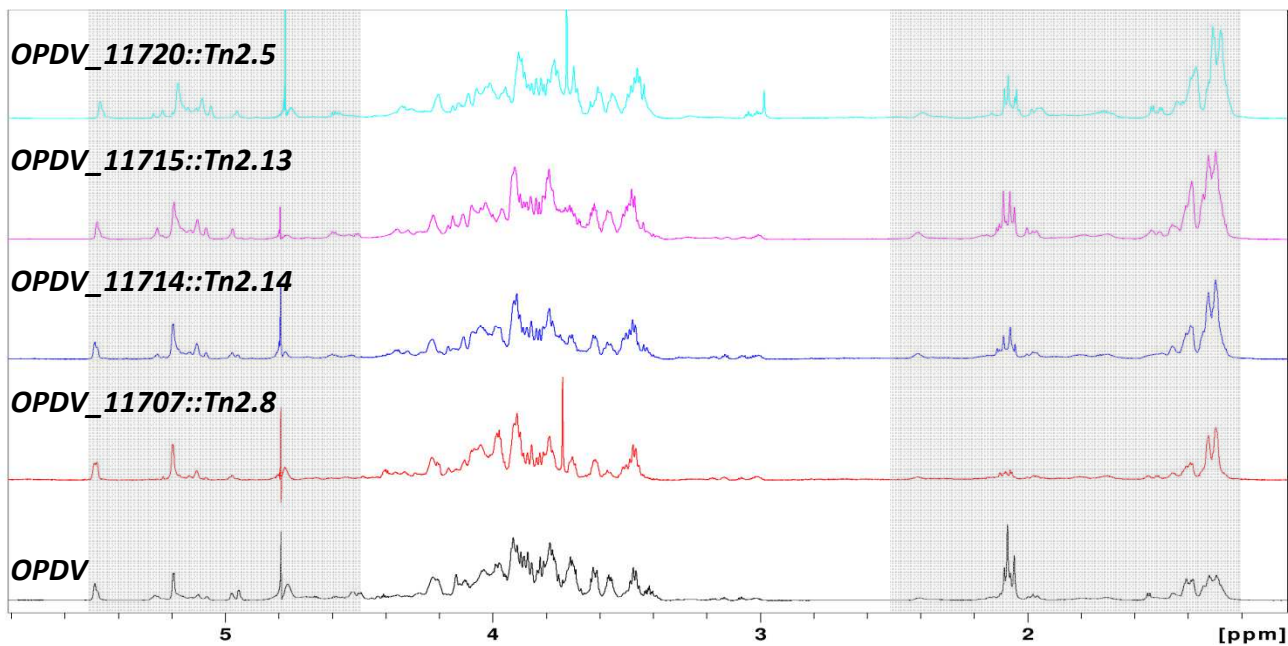

**B**

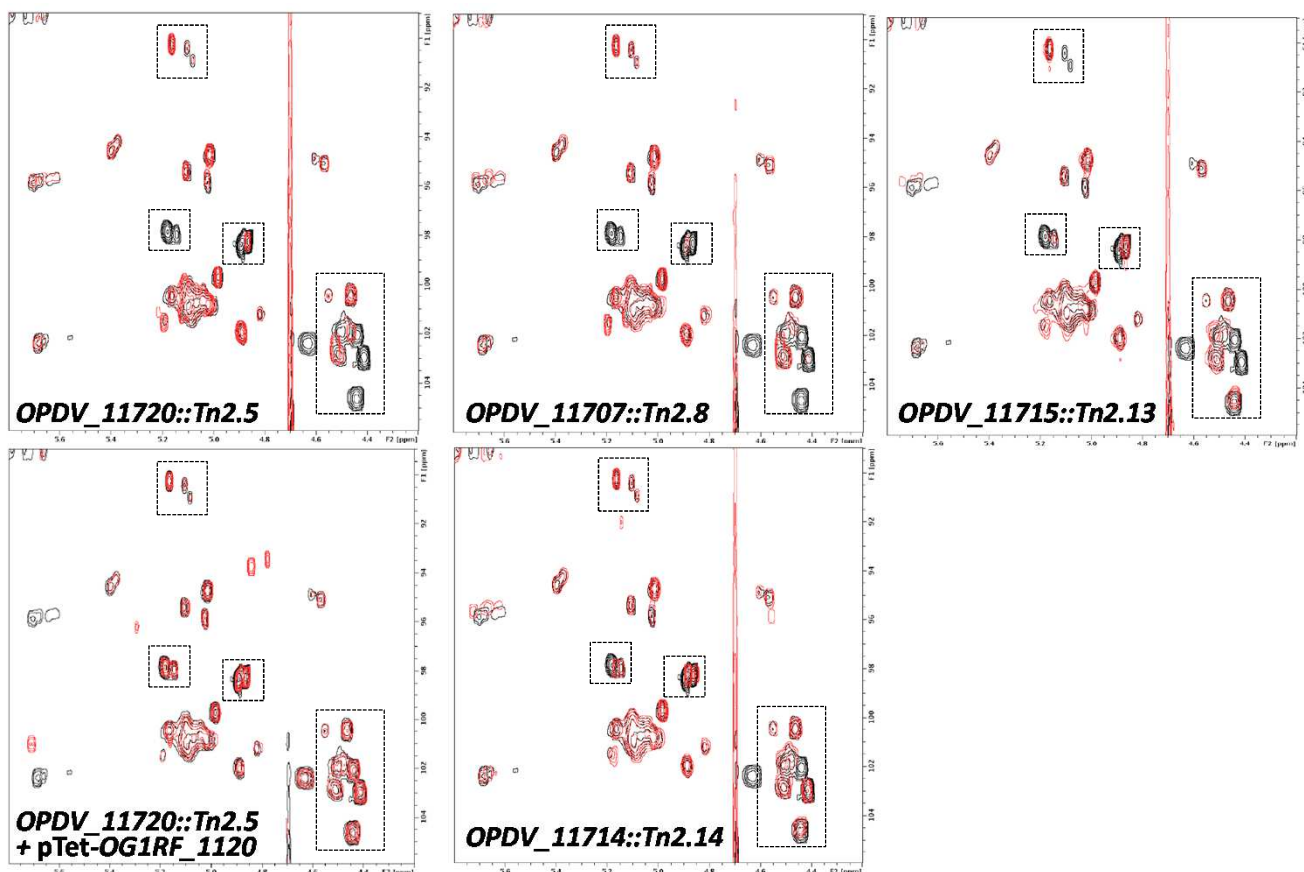

**Figure 4**



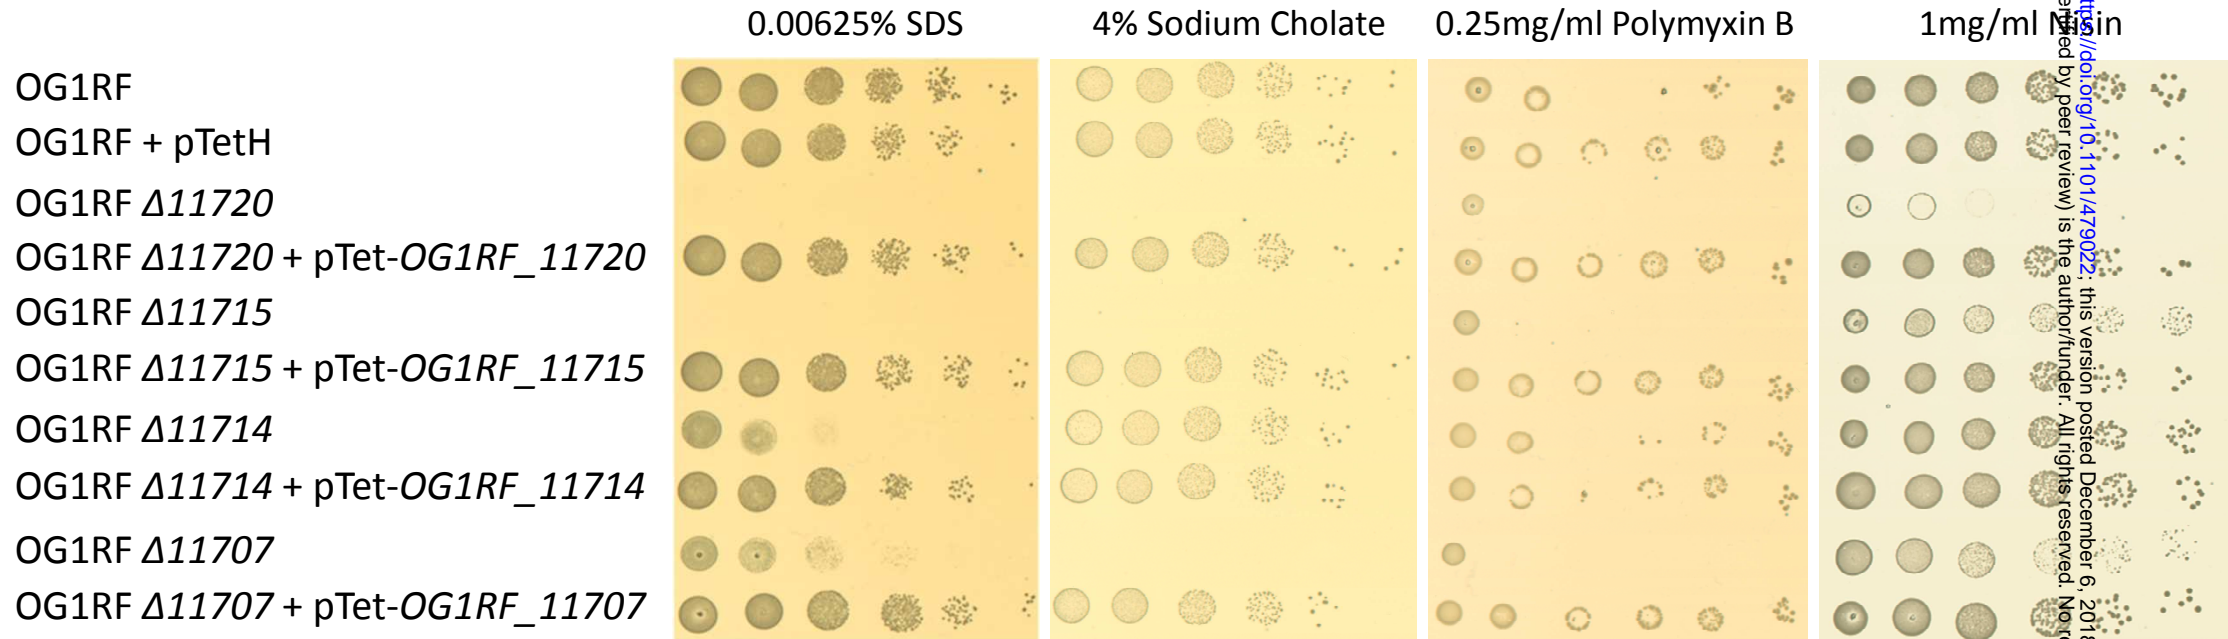

Figure 5



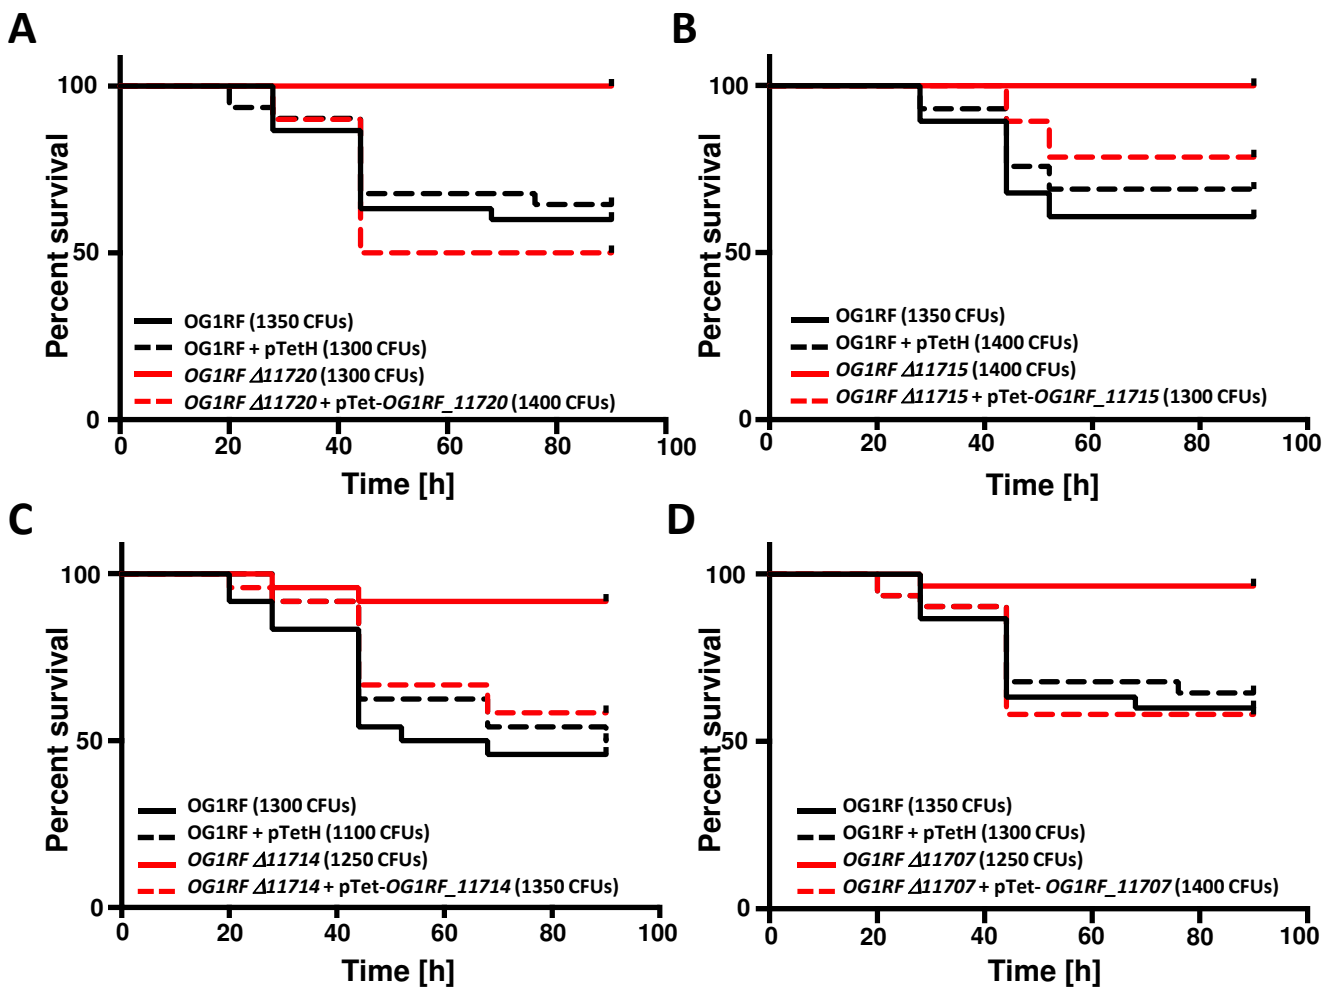

|                                                                 | Significance | P value |
|-----------------------------------------------------------------|--------------|---------|
| OG1RF vs OG1RF + pTetH                                          | ns           | 0.7158  |
| OG1RF vs OG1RF $\Delta$ 11720                                   | ****         | <0.0001 |
| OG1RF + pTetH vs OG1RF $\Delta$ 11720 + pTet-OG1RF_11720        | ns           | 0.3095  |
| OG1RF $\Delta$ 11720 vs OG1RF $\Delta$ 11720 + pTet-OG1RF_11720 | ****         | <0.0001 |
| OG1RF vs OG1RF + pTetH                                          | ns           | 0.4985  |
| OG1RF vs OG1RF $\Delta$ 11715                                   | ***          | 0.0001  |
| OG1RF + pTetH vs OG1RF $\Delta$ 11715 + pTet-OG1RF_11715        | ns           | 0.3501  |
| OG1RF $\Delta$ 11715 vs OG1RF $\Delta$ 11715 + pTet-OG1RF_11715 | **           | 0.0079  |
| OG1RF vs OG1RF + pTetH                                          | ns           | 0.6021  |
| OG1RF vs OG1RF $\Delta$ 11714                                   | ***          | 0.0008  |
| OG1RF + pTetH vs OG1RF $\Delta$ 11714 + pTet-OG1RF_11714        | ns           | 0.6186  |
| OG1RF $\Delta$ 11714 vs OG1RF $\Delta$ 11714 + pTet-OG1RF_11714 | **           | 0.0099  |
| OG1RF vs OG1RF + pTetH                                          | ns           | 0.7158  |
| OG1RF vs OG1RF $\Delta$ 11707                                   | **           | 0.0012  |
| OG1RF + pTetH vs OG1RF $\Delta$ 11707 + pTet-OG1RF_11707        | ns           | 0.6321  |
| OG1RF $\Delta$ 11707 vs OG1RF $\Delta$ 11707 + pTet-OG1RF_11707 | ***          | 0.0008  |

**Figure 6**

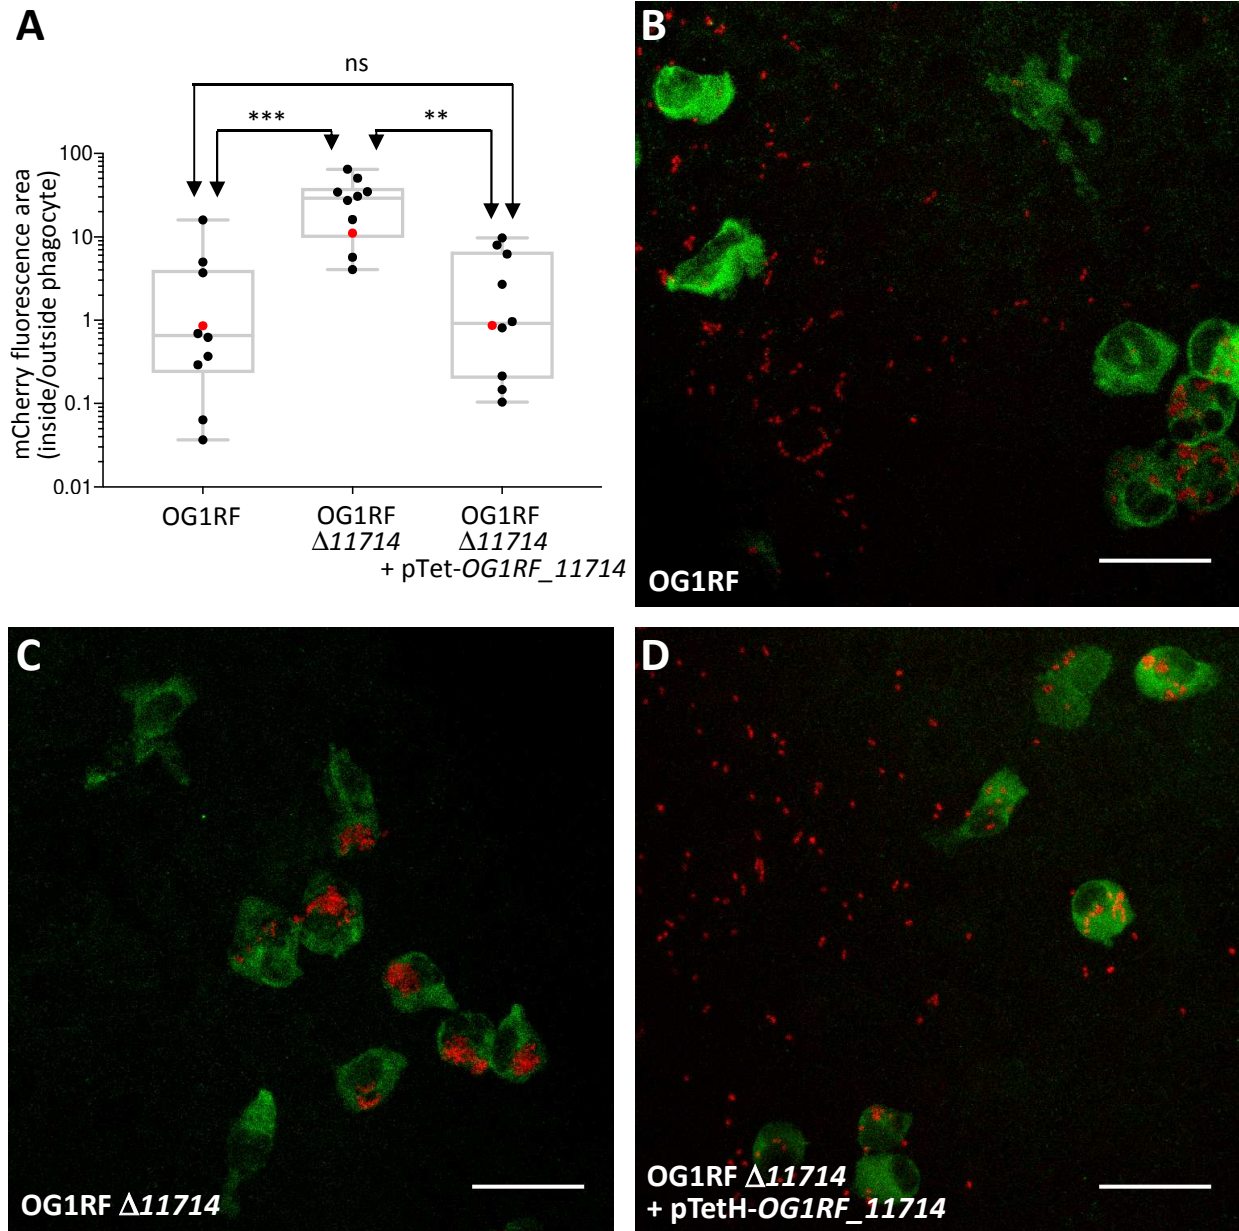

Source: https://www.biorxiv.org/content/10.1101/479022v2.full.pdf
